# Supplementary material
Source: publisher figshare collection journal article supplement (https://brill.figshare.com/ndownloader/files/27047252)
Supplement: Supplementary file 1 [file 27047252]

<?xml version="1.0" encoding="UTF-8"?><TreegraphDocument xmlns="http://bioinfweb.info/xmlns/xtg" xmlns:xsi="http://www.w3.org/2001/XMLSchema-instance" xsi:schemaLocation="http://bioinfweb.info/xmlns/xtg http://bioinfweb.info/xmlns/xtg/1.5.xsd"><GlobalFormats BgColor="#FFFFFF" BranchLengthScale="354.70984" ShowScaleBar="false" ShowRooted="true" AlignToSubtree="true" LabelsLeft="true"><DocMargin Left="2.0" Top="2.0" Right="2.0" Bottom="2.0"></DocMargin></GlobalFormats><NodeBranchDataAdapters><Adapter Name="info.bioinfweb.treegraph.nodeName" Purpose="info.bioinfweb.treegraph.defaultLeavesAdapter"></Adapter><Adapter Name="info.bioinfweb.treegraph.textLabelAdapter" ID="support" Purpose="info.bioinfweb.treegraph.defaultSupportAdapter"></Adapter></NodeBranchDataAdapters><Tree><Node UniqueName="6n434gb6lw" TextColor="#000000" TextHeight="6.0" TextStyle="" FontFamily="Arial" DecimalFormat="#0.0#####" LocaleLang="en" LocaleCountry="" LocaleVariant="" LineColor="#000000" LineWidth="0.3" EdgeRadius="1.0"><LeafMargin Left="1.0" Top="0.3" Right="1.0" Bottom="0.3"></LeafMargin><Branch LineColor="#000000" LineWidth="0.3" ConstantWidth="false" MinLength="4.0" MinSpaceAbove="0.0" MinSpaceBelow="0.0"></Branch><Node Text="Root" IsDecimal="false" UniqueName="unaty8m0fk" TextColor="#000000" TextHeight="6.0" TextStyle="" FontFamily="Arial" DecimalFormat="#0.0#####" LocaleLang="en" LocaleCountry="" LocaleVariant="" LineColor="#000000" LineWidth="0.3" EdgeRadius="1.0"><LeafMargin Left="1.0" Top="0.3" Right="1.0" Bottom="0.3"></LeafMargin><Branch Length="0.1529653" LineColor="#000000" LineWidth="0.3" ConstantWidth="false" MinLength="4.0" MinSpaceAbove="0.0" MinSpaceBelow="0.0"><PieChartLabel TextColor="#000000" TextHeight="6.0" TextStyle="" FontFamily="Arial" DecimalFormat="#0.0#####" LocaleLang="en" LocaleCountry="" LocaleVariant="" LineColor="#000000" LineWidth="0.3" Width="6.0" Height="6.0" InternalLines="true" NullLines="false" ShowTitle="false" CaptionType="NONE" CaptionLinkType="STRAIGHT_LINES" Id="12" Above="true" LineNo="0" LinePos="0.0"><LabelMargin Left="1.0" Top="1.0" Right="1.0" Bottom="1.0"></LabelMargin><DataIds TextColor="#000000" TextStyle="" FontFamily="Arial" DecimalFormat="#0.0#####" LocaleLang="en" LocaleCountry="" LocaleVariant=""><DataId PieColor="#0000FF" PieCaption="">12.0</DataId><DataId PieColor="#FF0000" PieCaption="">12.1</DataId></DataIds></PieChartLabel><InvisibleData Id="12.1" Text="0.0" IsDecimal="true"></InvisibleData><InvisibleData Id="12.0" Text="1.0" IsDecimal="true"></InvisibleData></Branch></Node><Node Text="Ontholestes murinus JF889840 1" IsDecimal="false" UniqueName="xvdbl3ndye" TextColor="#000000" TextHeight="6.0" TextStyle="" FontFamily="Arial" DecimalFormat="#0.0#####" LocaleLang="en" LocaleCountry="" LocaleVariant="" LineColor="#000000" LineWidth="0.3" EdgeRadius="1.0"><LeafMargin Left="1.0" Top="0.3" Right="1.0" Bottom="0.3"></LeafMargin><Branch Length="0.09153701" LineColor="#000000" LineWidth="0.3" ConstantWidth="false" MinLength="4.0" MinSpaceAbove="0.0" MinSpaceBelow="0.0"></Branch></Node><Node Text="internalNode1" IsDecimal="false" UniqueName="50qwsjcwhd" TextColor="#000000" TextHeight="6.0" TextStyle="" FontFamily="Arial" DecimalFormat="#0.0#####" LocaleLang="en" LocaleCountry="" LocaleVariant="" LineColor="#000000" LineWidth="0.3" EdgeRadius="1.0"><LeafMargin Left="1.0" Top="0.3" Right="1.0" Bottom="0.3"></LeafMargin><Branch Length="0.02484799" LineColor="#000000" LineWidth="0.3" ConstantWidth="false" MinLength="4.0" MinSpaceAbove="0.0" MinSpaceBelow="0.0"><PieChartLabel TextColor="#000000" TextHeight="6.0" TextStyle="" FontFamily="Arial" DecimalFormat="#0.0#####" LocaleLang="en" LocaleCountry="" LocaleVariant="" LineColor="#000000" LineWidth="0.3" Width="6.0" Height="6.0" InternalLines="true" NullLines="false" ShowTitle="false" CaptionType="NONE" CaptionLinkType="STRAIGHT_LINES" Id="12" Above="true" LineNo="0" LinePos="0.0"><LabelMargin Left="1.0" Top="1.0" Right="1.0" Bottom="1.0"></LabelMargin><DataIds TextColor="#000000" TextStyle="" FontFamily="Arial" DecimalFormat="#0.0#####" LocaleLang="en" LocaleCountry="" LocaleVariant=""><DataId PieColor="#0000FF" PieCaption="">12.0</DataId><DataId PieColor="#FF0000" PieCaption="">12.1</DataId></DataIds></PieChartLabel><InvisibleData Id="12.1" Text="0.0" IsDecimal="true"></InvisibleData><InvisibleData Id="12.0" Text="1.0" IsDecimal="true"></InvisibleData></Branch><Node Text="internalNode2" IsDecimal="false" UniqueName="duw6embp8f" TextColor="#000000" TextHeight="6.0" TextStyle="" FontFamily="Arial" DecimalFormat="#0.0#####" LocaleLang="en" LocaleCountry="" LocaleVariant="" LineColor="#000000" LineWidth="0.3" EdgeRadius="1.0"><LeafMargin Left="1.0" Top="0.3" Right="1.0" Bottom="0.3"></LeafMargin><Branch Length="0.07979765" LineColor="#000000" LineWidth="0.3" ConstantWidth="false" MinLength="4.0" MinSpaceAbove="0.0" MinSpaceBelow="0.0"><PieChartLabel TextColor="#000000" TextHeight="6.0" TextStyle="" FontFamily="Arial" DecimalFormat="#0.0#####" LocaleLang="en" LocaleCountry="" LocaleVariant="" LineColor="#000000" LineWidth="0.3" Width="6.0" Height="6.0" InternalLines="true" NullLines="false" ShowTitle="false" CaptionType="NONE" CaptionLinkType="STRAIGHT_LINES" Id="12" Above="true" LineNo="0" LinePos="0.0"><LabelMargin Left="1.0" Top="1.0" Right="1.0" Bottom="1.0"></LabelMargin><DataIds TextColor="#000000" TextStyle="" FontFamily="Arial" DecimalFormat="#0.0#####" LocaleLang="en" LocaleCountry="" LocaleVariant=""><DataId PieColor="#0000FF" PieCaption="">12.0</DataId><DataId PieColor="#FF0000" PieCaption="">12.1</DataId></DataIds></PieChartLabel><InvisibleData Id="12.1" Text="0.0" IsDecimal="true"></InvisibleData><InvisibleData Id="12.0" Text="1.0" IsDecimal="true"></InvisibleData></Branch><Node Text="internalNode3" IsDecimal="false" UniqueName="ivkxpz8wk0" TextColor="#000000" TextHeight="6.0" TextStyle="" FontFamily="Arial" DecimalFormat="#0.0#####" LocaleLang="en" LocaleCountry="" LocaleVariant="" LineColor="#000000" LineWidth="0.3" EdgeRadius="1.0"><LeafMargin Left="1.0" Top="0.3" Right="1.0" Bottom="0.3"></LeafMargin><Branch Length="0.03892916" LineColor="#000000" LineWidth="0.3" ConstantWidth="false" MinLength="4.0" MinSpaceAbove="0.0" MinSpaceBelow="0.0"><PieChartLabel TextColor="#000000" TextHeight="6.0" TextStyle="" FontFamily="Arial" DecimalFormat="#0.0#####" LocaleLang="en" LocaleCountry="" LocaleVariant="" LineColor="#000000" LineWidth="0.3" Width="6.0" Height="6.0" InternalLines="true" NullLines="false" ShowTitle="false" CaptionType="NONE" CaptionLinkType="STRAIGHT_LINES" Id="12" Above="true" LineNo="0" LinePos="0.0"><LabelMargin Left="1.0" Top="1.0" Right="1.0" Bottom="1.0"></LabelMargin><DataIds TextColor="#000000" TextStyle="" FontFamily="Arial" DecimalFormat="#0.0#####" LocaleLang="en" LocaleCountry="" LocaleVariant=""><DataId PieColor="#0000FF" PieCaption="">12.0</DataId><DataId PieColor="#FF0000" PieCaption="">12.1</DataId></DataIds></PieChartLabel><InvisibleData Id="12.1" Text="0.0" IsDecimal="true"></InvisibleData><InvisibleData Id="12.0" Text="1.0" IsDecimal="true"></InvisibleData></Branch><Node Text="Oxyporus P cyanipennis PrimKr01 19 186" IsDecimal="false" UniqueName="0x5pnrhvki" TextColor="#000000" TextHeight="6.0" TextStyle="" FontFamily="Arial" DecimalFormat="#0.0#####" LocaleLang="en" LocaleCountry="" LocaleVariant="" LineColor="#000000" LineWidth="0.3" EdgeRadius="1.0"><LeafMargin Left="1.0" Top="0.3" Right="1.0" Bottom="0.3"></LeafMargin><Branch Length="0.05012421" LineColor="#000000" LineWidth="0.3" ConstantWidth="false" MinLength="4.0" MinSpaceAbove="0.0" MinSpaceBelow="0.0"></Branch></Node><Node Text="internalNode4" IsDecimal="false" UniqueName="8oh5w0h0ln" TextColor="#000000" TextHeight="6.0" TextStyle="" FontFamily="Arial" DecimalFormat="#0.0#####" LocaleLang="en" LocaleCountry="" LocaleVariant="" LineColor="#000000" LineWidth="0.3" EdgeRadius="1.0"><LeafMargin Left="1.0" Top="0.3" Right="1.0" Bottom="0.3"></LeafMargin><Branch Length="0.02066984" LineColor="#000000" LineWidth="0.3" ConstantWidth="false" MinLength="4.0" MinSpaceAbove="0.0" MinSpaceBelow="0.0"><PieChartLabel TextColor="#000000" TextHeight="6.0" TextStyle="" FontFamily="Arial" DecimalFormat="#0.0#####" LocaleLang="en" LocaleCountry="" LocaleVariant="" LineColor="#000000" LineWidth="0.3" Width="6.0" Height="6.0" InternalLines="true" NullLines="false" ShowTitle="false" CaptionType="NONE" CaptionLinkType="STRAIGHT_LINES" Id="12" Above="true" LineNo="0" LinePos="0.0"><LabelMargin Left="1.0" Top="1.0" Right="1.0" Bottom="1.0"></LabelMargin><DataIds TextColor="#000000" TextStyle="" FontFamily="Arial" DecimalFormat="#0.0#####" LocaleLang="en" LocaleCountry="" LocaleVariant=""><DataId PieColor="#0000FF" PieCaption="">12.0</DataId><DataId PieColor="#FF0000" PieCaption="">12.1</DataId></DataIds></PieChartLabel><InvisibleData Id="12.1" Text="0.0" IsDecimal="true"></InvisibleData><InvisibleData Id="12.0" Text="1.0" IsDecimal="true"></InvisibleData></Branch><Node Text="internalNode5" IsDecimal="false" UniqueName="irrpbr07nc" TextColor="#000000" TextHeight="6.0" TextStyle="" FontFamily="Arial" DecimalFormat="#0.0#####" LocaleLang="en" LocaleCountry="" LocaleVariant="" LineColor="#000000" LineWidth="0.3" EdgeRadius="1.0"><LeafMargin Left="1.0" Top="0.3" Right="1.0" Bottom="0.3"></LeafMargin><Branch Length="0.04482259" LineColor="#000000" LineWidth="0.3" ConstantWidth="false" MinLength="4.0" MinSpaceAbove="0.0" MinSpaceBelow="0.0"><PieChartLabel TextColor="#000000" TextHeight="6.0" TextStyle="" FontFamily="Arial" DecimalFormat="#0.0#####" LocaleLang="en" LocaleCountry="" LocaleVariant="" LineColor="#000000" LineWidth="0.3" Width="6.0" Height="6.0" InternalLines="true" NullLines="false" ShowTitle="false" CaptionType="NONE" CaptionLinkType="STRAIGHT_LINES" Id="12" Above="true" LineNo="0" LinePos="0.0"><LabelMargin Left="1.0" Top="1.0" Right="1.0" Bottom="1.0"></LabelMargin><DataIds TextColor="#000000" TextStyle="" FontFamily="Arial" DecimalFormat="#0.0#####" LocaleLang="en" LocaleCountry="" LocaleVariant=""><DataId PieColor="#0000FF" PieCaption="">12.0</DataId><DataId PieColor="#FF0000" PieCaption="">12.1</DataId></DataIds></PieChartLabel><InvisibleData Id="12.1" Text="0.0" IsDecimal="true"></InvisibleData><InvisibleData Id="12.0" Text="1.0" IsDecimal="true"></InvisibleData></Branch><Node Text="internalNode6" IsDecimal="false" UniqueName="d0dprqrvbi" TextColor="#000000" TextHeight="6.0" TextStyle="" FontFamily="Arial" DecimalFormat="#0.0#####" LocaleLang="en" LocaleCountry="" LocaleVariant="" LineColor="#000000" LineWidth="0.3" EdgeRadius="1.0"><LeafMargin Left="1.0" Top="0.3" Right="1.0" Bottom="0.3"></LeafMargin><Branch Length="0.06337272" LineColor="#000000" LineWidth="0.3" ConstantWidth="false" MinLength="4.0" MinSpaceAbove="0.0" MinSpaceBelow="0.0"><PieChartLabel TextColor="#000000" TextHeight="6.0" TextStyle="" FontFamily="Arial" DecimalFormat="#0.0#####" LocaleLang="en" LocaleCountry="" LocaleVariant="" LineColor="#000000" LineWidth="0.3" Width="6.0" Height="6.0" InternalLines="true" NullLines="false" ShowTitle="false" CaptionType="NONE" CaptionLinkType="STRAIGHT_LINES" Id="12" Above="true" LineNo="0" LinePos="0.0"><LabelMargin Left="1.0" Top="1.0" Right="1.0" Bottom="1.0"></LabelMargin><DataIds TextColor="#000000" TextStyle="" FontFamily="Arial" DecimalFormat="#0.0#####" LocaleLang="en" LocaleCountry="" LocaleVariant=""><DataId PieColor="#0000FF" PieCaption="">12.0</DataId><DataId PieColor="#FF0000" PieCaption="">12.1</DataId></DataIds></PieChartLabel><InvisibleData Id="12.1" Text="0.0" IsDecimal="true"></InvisibleData><InvisibleData Id="12.0" Text="1.0" IsDecimal="true"></InvisibleData></Branch><Node Text="Oxyporus P dybowskii Altay19 34b 17" IsDecimal="false" UniqueName="xdry2uitja" TextColor="#000000" TextHeight="6.0" TextStyle="" FontFamily="Arial" DecimalFormat="#0.0#####" LocaleLang="en" LocaleCountry="" LocaleVariant="" LineColor="#000000" LineWidth="0.3" EdgeRadius="1.0"><LeafMargin Left="1.0" Top="0.3" Right="1.0" Bottom="0.3"></LeafMargin><Branch Length="0.01077851" LineColor="#000000" LineWidth="0.3" ConstantWidth="false" MinLength="4.0" MinSpaceAbove="0.0" MinSpaceBelow="0.0"></Branch></Node><Node Text="Oxyporus P dybowskii CNUIC567" IsDecimal="false" UniqueName="rcaxrmfr2q" TextColor="#000000" TextHeight="6.0" TextStyle="" FontFamily="Arial" DecimalFormat="#0.0#####" LocaleLang="en" LocaleCountry="" LocaleVariant="" LineColor="#000000" LineWidth="0.3" EdgeRadius="1.0"><LeafMargin Left="1.0" Top="0.3" Right="1.0" Bottom="0.3"></LeafMargin><Branch Length="0.01593421" LineColor="#000000" LineWidth="0.3" ConstantWidth="false" MinLength="4.0" MinSpaceAbove="0.0" MinSpaceBelow="0.0"></Branch></Node></Node><Node Text="internalNode7" IsDecimal="false" UniqueName="tzdz536b5q" TextColor="#000000" TextHeight="6.0" TextStyle="" FontFamily="Arial" DecimalFormat="#0.0#####" LocaleLang="en" LocaleCountry="" LocaleVariant="" LineColor="#000000" LineWidth="0.3" EdgeRadius="1.0"><LeafMargin Left="1.0" Top="0.3" Right="1.0" Bottom="0.3"></LeafMargin><Branch Length="0.06309511" LineColor="#000000" LineWidth="0.3" ConstantWidth="false" MinLength="4.0" MinSpaceAbove="0.0" MinSpaceBelow="0.0"><PieChartLabel TextColor="#000000" TextHeight="6.0" TextStyle="" FontFamily="Arial" DecimalFormat="#0.0#####" LocaleLang="en" LocaleCountry="" LocaleVariant="" LineColor="#000000" LineWidth="0.3" Width="6.0" Height="6.0" InternalLines="true" NullLines="false" ShowTitle="false" CaptionType="NONE" CaptionLinkType="STRAIGHT_LINES" Id="12" Above="true" LineNo="0" LinePos="0.0"><LabelMargin Left="1.0" Top="1.0" Right="1.0" Bottom="1.0"></LabelMargin><DataIds TextColor="#000000" TextStyle="" FontFamily="Arial" DecimalFormat="#0.0#####" LocaleLang="en" LocaleCountry="" LocaleVariant=""><DataId PieColor="#0000FF" PieCaption="">12.0</DataId><DataId PieColor="#FF0000" PieCaption="">12.1</DataId></DataIds></PieChartLabel><InvisibleData Id="12.1" Text="0.0" IsDecimal="true"></InvisibleData><InvisibleData Id="12.0" Text="1.0" IsDecimal="true"></InvisibleData></Branch><Node Text="internalNode8" IsDecimal="false" UniqueName="3ulifrfyy0" TextColor="#000000" TextHeight="6.0" TextStyle="" FontFamily="Arial" DecimalFormat="#0.0#####" LocaleLang="en" LocaleCountry="" LocaleVariant="" LineColor="#000000" LineWidth="0.3" EdgeRadius="1.0"><LeafMargin Left="1.0" Top="0.3" Right="1.0" Bottom="0.3"></LeafMargin><Branch Length="0.004138651" LineColor="#000000" LineWidth="0.3" ConstantWidth="false" MinLength="4.0" MinSpaceAbove="0.0" MinSpaceBelow="0.0"><PieChartLabel TextColor="#000000" TextHeight="6.0" TextStyle="" FontFamily="Arial" DecimalFormat="#0.0#####" LocaleLang="en" LocaleCountry="" LocaleVariant="" LineColor="#000000" LineWidth="0.3" Width="6.0" Height="6.0" InternalLines="true" NullLines="false" ShowTitle="false" CaptionType="NONE" CaptionLinkType="STRAIGHT_LINES" Id="12" Above="true" LineNo="0" LinePos="0.0"><LabelMargin Left="1.0" Top="1.0" Right="1.0" Bottom="1.0"></LabelMargin><DataIds TextColor="#000000" TextStyle="" FontFamily="Arial" DecimalFormat="#0.0#####" LocaleLang="en" LocaleCountry="" LocaleVariant=""><DataId PieColor="#0000FF" PieCaption="">12.0</DataId><DataId PieColor="#FF0000" PieCaption="">12.1</DataId></DataIds></PieChartLabel><InvisibleData Id="12.1" Text="0.0" IsDecimal="true"></InvisibleData><InvisibleData Id="12.0" Text="1.0" IsDecimal="true"></InvisibleData></Branch><Node Text="Oxyporus occipitalis JF887772 1" IsDecimal="false" UniqueName="221c5oexjk" TextColor="#000000" TextHeight="6.0" TextStyle="" FontFamily="Arial" DecimalFormat="#0.0#####" LocaleLang="en" LocaleCountry="" LocaleVariant="" LineColor="#000000" LineWidth="0.3" EdgeRadius="1.0"><LeafMargin Left="1.0" Top="0.3" Right="1.0" Bottom="0.3"></LeafMargin><Branch Length="0.001125864" LineColor="#000000" LineWidth="0.3" ConstantWidth="false" MinLength="4.0" MinSpaceAbove="0.0" MinSpaceBelow="0.0"></Branch></Node><Node Text="Oxyporus occipitalis KM850520 1" IsDecimal="false" UniqueName="tjs0515hxw" TextColor="#000000" TextHeight="6.0" TextStyle="" FontFamily="Arial" DecimalFormat="#0.0#####" LocaleLang="en" LocaleCountry="" LocaleVariant="" LineColor="#000000" LineWidth="0.3" EdgeRadius="1.0"><LeafMargin Left="1.0" Top="0.3" Right="1.0" Bottom="0.3"></LeafMargin><Branch Length="0.001119014" LineColor="#000000" LineWidth="0.3" ConstantWidth="false" MinLength="4.0" MinSpaceAbove="0.0" MinSpaceBelow="0.0"></Branch></Node><Node Text="Oxyporus occipitalis5 KM842302" IsDecimal="false" UniqueName="htst1bzakf" TextColor="#000000" TextHeight="6.0" TextStyle="" FontFamily="Arial" DecimalFormat="#0.0#####" LocaleLang="en" LocaleCountry="" LocaleVariant="" LineColor="#000000" LineWidth="0.3" EdgeRadius="1.0"><LeafMargin Left="1.0" Top="0.3" Right="1.0" Bottom="0.3"></LeafMargin><Branch Length="0.001050658" LineColor="#000000" LineWidth="0.3" ConstantWidth="false" MinLength="4.0" MinSpaceAbove="0.0" MinSpaceBelow="0.0"></Branch></Node></Node><Node Text="internalNode9" IsDecimal="false" UniqueName="q9q3mt4o38" TextColor="#000000" TextHeight="6.0" TextStyle="" FontFamily="Arial" DecimalFormat="#0.0#####" LocaleLang="en" LocaleCountry="" LocaleVariant="" LineColor="#000000" LineWidth="0.3" EdgeRadius="1.0"><LeafMargin Left="1.0" Top="0.3" Right="1.0" Bottom="0.3"></LeafMargin><Branch Length="0.002531579" LineColor="#000000" LineWidth="0.3" ConstantWidth="false" MinLength="4.0" MinSpaceAbove="0.0" MinSpaceBelow="0.0"><PieChartLabel TextColor="#000000" TextHeight="6.0" TextStyle="" FontFamily="Arial" DecimalFormat="#0.0#####" LocaleLang="en" LocaleCountry="" LocaleVariant="" LineColor="#000000" LineWidth="0.3" Width="6.0" Height="6.0" InternalLines="true" NullLines="false" ShowTitle="false" CaptionType="NONE" CaptionLinkType="STRAIGHT_LINES" Id="12" Above="true" LineNo="0" LinePos="0.0"><LabelMargin Left="1.0" Top="1.0" Right="1.0" Bottom="1.0"></LabelMargin><DataIds TextColor="#000000" TextStyle="" FontFamily="Arial" DecimalFormat="#0.0#####" LocaleLang="en" LocaleCountry="" LocaleVariant=""><DataId PieColor="#0000FF" PieCaption="">12.0</DataId><DataId PieColor="#FF0000" PieCaption="">12.1</DataId></DataIds></PieChartLabel><InvisibleData Id="12.1" Text="0.0" IsDecimal="true"></InvisibleData><InvisibleData Id="12.0" Text="1.0" IsDecimal="true"></InvisibleData></Branch><Node Text="internalNode10" IsDecimal="false" UniqueName="rd784hzmyk" TextColor="#000000" TextHeight="6.0" TextStyle="" FontFamily="Arial" DecimalFormat="#0.0#####" LocaleLang="en" LocaleCountry="" LocaleVariant="" LineColor="#000000" LineWidth="0.3" EdgeRadius="1.0"><LeafMargin Left="1.0" Top="0.3" Right="1.0" Bottom="0.3"></LeafMargin><Branch Length="0.002528061" LineColor="#000000" LineWidth="0.3" ConstantWidth="false" MinLength="4.0" MinSpaceAbove="0.0" MinSpaceBelow="0.0"><PieChartLabel TextColor="#000000" TextHeight="6.0" TextStyle="" FontFamily="Arial" DecimalFormat="#0.0#####" LocaleLang="en" LocaleCountry="" LocaleVariant="" LineColor="#000000" LineWidth="0.3" Width="6.0" Height="6.0" InternalLines="true" NullLines="false" ShowTitle="false" CaptionType="NONE" CaptionLinkType="STRAIGHT_LINES" Id="12" Above="true" LineNo="0" LinePos="0.0"><LabelMargin Left="1.0" Top="1.0" Right="1.0" Bottom="1.0"></LabelMargin><DataIds TextColor="#000000" TextStyle="" FontFamily="Arial" DecimalFormat="#0.0#####" LocaleLang="en" LocaleCountry="" LocaleVariant=""><DataId PieColor="#0000FF" PieCaption="">12.0</DataId><DataId PieColor="#FF0000" PieCaption="">12.1</DataId></DataIds></PieChartLabel><InvisibleData Id="12.1" Text="0.0" IsDecimal="true"></InvisibleData><InvisibleData Id="12.0" Text="1.0" IsDecimal="true"></InvisibleData></Branch><Node Text="Oxyporus occipitalis KU875724 1" IsDecimal="false" UniqueName="8yd5n2hk27" TextColor="#000000" TextHeight="6.0" TextStyle="" FontFamily="Arial" DecimalFormat="#0.0#####" LocaleLang="en" LocaleCountry="" LocaleVariant="" LineColor="#000000" LineWidth="0.3" EdgeRadius="1.0"><LeafMargin Left="1.0" Top="0.3" Right="1.0" Bottom="0.3"></LeafMargin><Branch Length="0.001166645" LineColor="#000000" LineWidth="0.3" ConstantWidth="false" MinLength="4.0" MinSpaceAbove="0.0" MinSpaceBelow="0.0"></Branch></Node><Node Text="Oxyporus occipitalis1 KU875724" IsDecimal="false" UniqueName="tm0idzfhzj" TextColor="#000000" TextHeight="6.0" TextStyle="" FontFamily="Arial" DecimalFormat="#0.0#####" LocaleLang="en" LocaleCountry="" LocaleVariant="" LineColor="#000000" LineWidth="0.3" EdgeRadius="1.0"><LeafMargin Left="1.0" Top="0.3" Right="1.0" Bottom="0.3"></LeafMargin><Branch Length="0.001066982" LineColor="#000000" LineWidth="0.3" ConstantWidth="false" MinLength="4.0" MinSpaceAbove="0.0" MinSpaceBelow="0.0"></Branch></Node></Node><Node Text="Oxyporus occipitalis2 KU875723" IsDecimal="false" UniqueName="c1tc0ixmxy" TextColor="#000000" TextHeight="6.0" TextStyle="" FontFamily="Arial" DecimalFormat="#0.0#####" LocaleLang="en" LocaleCountry="" LocaleVariant="" LineColor="#000000" LineWidth="0.3" EdgeRadius="1.0"><LeafMargin Left="1.0" Top="0.3" Right="1.0" Bottom="0.3"></LeafMargin><Branch Length="0.001142134" LineColor="#000000" LineWidth="0.3" ConstantWidth="false" MinLength="4.0" MinSpaceAbove="0.0" MinSpaceBelow="0.0"></Branch></Node></Node><Node Text="Oxyporus occipitalis3 KM850956" IsDecimal="false" UniqueName="mhgl21780k" TextColor="#000000" TextHeight="6.0" TextStyle="" FontFamily="Arial" DecimalFormat="#0.0#####" LocaleLang="en" LocaleCountry="" LocaleVariant="" LineColor="#000000" LineWidth="0.3" EdgeRadius="1.0"><LeafMargin Left="1.0" Top="0.3" Right="1.0" Bottom="0.3"></LeafMargin><Branch Length="0.001059797" LineColor="#000000" LineWidth="0.3" ConstantWidth="false" MinLength="4.0" MinSpaceAbove="0.0" MinSpaceBelow="0.0"></Branch></Node><Node Text="Oxyporus occipitalis4 KM843321" IsDecimal="false" UniqueName="yutlv1158l" TextColor="#000000" TextHeight="6.0" TextStyle="" FontFamily="Arial" DecimalFormat="#0.0#####" LocaleLang="en" LocaleCountry="" LocaleVariant="" LineColor="#000000" LineWidth="0.3" EdgeRadius="1.0"><LeafMargin Left="1.0" Top="0.3" Right="1.0" Bottom="0.3"></LeafMargin><Branch Length="0.001034767" LineColor="#000000" LineWidth="0.3" ConstantWidth="false" MinLength="4.0" MinSpaceAbove="0.0" MinSpaceBelow="0.0"></Branch></Node><Node Text="Oxyporus occipitalis6 KM844801" IsDecimal="false" UniqueName="f9hrhhn9qd" TextColor="#000000" TextHeight="6.0" TextStyle="" FontFamily="Arial" DecimalFormat="#0.0#####" LocaleLang="en" LocaleCountry="" LocaleVariant="" LineColor="#000000" LineWidth="0.3" EdgeRadius="1.0"><LeafMargin Left="1.0" Top="0.3" Right="1.0" Bottom="0.3"></LeafMargin><Branch Length="0.00538531" LineColor="#000000" LineWidth="0.3" ConstantWidth="false" MinLength="4.0" MinSpaceAbove="0.0" MinSpaceBelow="0.0"></Branch></Node><Node Text="Oxyporus occipitalis7 KM844575" IsDecimal="false" UniqueName="mqhmv003hi" TextColor="#000000" TextHeight="6.0" TextStyle="" FontFamily="Arial" DecimalFormat="#0.0#####" LocaleLang="en" LocaleCountry="" LocaleVariant="" LineColor="#000000" LineWidth="0.3" EdgeRadius="1.0"><LeafMargin Left="1.0" Top="0.3" Right="1.0" Bottom="0.3"></LeafMargin><Branch Length="0.00104352" LineColor="#000000" LineWidth="0.3" ConstantWidth="false" MinLength="4.0" MinSpaceAbove="0.0" MinSpaceBelow="0.0"></Branch></Node></Node></Node><Node Text="internalNode11" IsDecimal="false" UniqueName="cgsqw66ua8" TextColor="#000000" TextHeight="6.0" TextStyle="" FontFamily="Arial" DecimalFormat="#0.0#####" LocaleLang="en" LocaleCountry="" LocaleVariant="" LineColor="#000000" LineWidth="0.3" EdgeRadius="1.0"><LeafMargin Left="1.0" Top="0.3" Right="1.0" Bottom="0.3"></LeafMargin><Branch Length="0.08931283" LineColor="#000000" LineWidth="0.3" ConstantWidth="false" MinLength="4.0" MinSpaceAbove="0.0" MinSpaceBelow="0.0"><PieChartLabel TextColor="#000000" TextHeight="6.0" TextStyle="" FontFamily="Arial" DecimalFormat="#0.0#####" LocaleLang="en" LocaleCountry="" LocaleVariant="" LineColor="#000000" LineWidth="0.3" Width="6.0" Height="6.0" InternalLines="true" NullLines="false" ShowTitle="false" CaptionType="NONE" CaptionLinkType="STRAIGHT_LINES" Id="12" Above="true" LineNo="0" LinePos="0.0"><LabelMargin Left="1.0" Top="1.0" Right="1.0" Bottom="1.0"></LabelMargin><DataIds TextColor="#000000" TextStyle="" FontFamily="Arial" DecimalFormat="#0.0#####" LocaleLang="en" LocaleCountry="" LocaleVariant=""><DataId PieColor="#0000FF" PieCaption="">12.0</DataId><DataId PieColor="#FF0000" PieCaption="">12.1</DataId></DataIds></PieChartLabel><InvisibleData Id="12.1" Text="0.0" IsDecimal="true"></InvisibleData><InvisibleData Id="12.0" Text="1.0" IsDecimal="true"></InvisibleData></Branch><Node Text="Oxyporus P melanocephalus CNUIC568" IsDecimal="false" UniqueName="w6lslxek5e" TextColor="#000000" TextHeight="6.0" TextStyle="" FontFamily="Arial" DecimalFormat="#0.0#####" LocaleLang="en" LocaleCountry="" LocaleVariant="" LineColor="#000000" LineWidth="0.3" EdgeRadius="1.0"><LeafMargin Left="1.0" Top="0.3" Right="1.0" Bottom="0.3"></LeafMargin><Branch Length="0.003793082" LineColor="#000000" LineWidth="0.3" ConstantWidth="false" MinLength="4.0" MinSpaceAbove="0.0" MinSpaceBelow="0.0"></Branch></Node><Node Text="internalNode12" IsDecimal="false" UniqueName="8vse45fkgc" TextColor="#000000" TextHeight="6.0" TextStyle="" FontFamily="Arial" DecimalFormat="#0.0#####" LocaleLang="en" LocaleCountry="" LocaleVariant="" LineColor="#000000" LineWidth="0.3" EdgeRadius="1.0"><LeafMargin Left="1.0" Top="0.3" Right="1.0" Bottom="0.3"></LeafMargin><Branch Length="0.01058519" LineColor="#000000" LineWidth="0.3" ConstantWidth="false" MinLength="4.0" MinSpaceAbove="0.0" MinSpaceBelow="0.0"><PieChartLabel TextColor="#000000" TextHeight="6.0" TextStyle="" FontFamily="Arial" DecimalFormat="#0.0#####" LocaleLang="en" LocaleCountry="" LocaleVariant="" LineColor="#000000" LineWidth="0.3" Width="6.0" Height="6.0" InternalLines="true" NullLines="false" ShowTitle="false" CaptionType="NONE" CaptionLinkType="STRAIGHT_LINES" Id="12" Above="true" LineNo="0" LinePos="0.0"><LabelMargin Left="1.0" Top="1.0" Right="1.0" Bottom="1.0"></LabelMargin><DataIds TextColor="#000000" TextStyle="" FontFamily="Arial" DecimalFormat="#0.0#####" LocaleLang="en" LocaleCountry="" LocaleVariant=""><DataId PieColor="#0000FF" PieCaption="">12.0</DataId><DataId PieColor="#FF0000" PieCaption="">12.1</DataId></DataIds></PieChartLabel><InvisibleData Id="12.1" Text="0.0" IsDecimal="true"></InvisibleData><InvisibleData Id="12.0" Text="1.0" IsDecimal="true"></InvisibleData></Branch><Node Text="internalNode13" IsDecimal="false" UniqueName="zmd0kdds00" TextColor="#000000" TextHeight="6.0" TextStyle="" FontFamily="Arial" DecimalFormat="#0.0#####" LocaleLang="en" LocaleCountry="" LocaleVariant="" LineColor="#000000" LineWidth="0.3" EdgeRadius="1.0"><LeafMargin Left="1.0" Top="0.3" Right="1.0" Bottom="0.3"></LeafMargin><Branch Length="0.002403118" LineColor="#000000" LineWidth="0.3" ConstantWidth="false" MinLength="4.0" MinSpaceAbove="0.0" MinSpaceBelow="0.0"><PieChartLabel TextColor="#000000" TextHeight="6.0" TextStyle="" FontFamily="Arial" DecimalFormat="#0.0#####" LocaleLang="en" LocaleCountry="" LocaleVariant="" LineColor="#000000" LineWidth="0.3" Width="6.0" Height="6.0" InternalLines="true" NullLines="false" ShowTitle="false" CaptionType="NONE" CaptionLinkType="STRAIGHT_LINES" Id="12" Above="true" LineNo="0" LinePos="0.0"><LabelMargin Left="1.0" Top="1.0" Right="1.0" Bottom="1.0"></LabelMargin><DataIds TextColor="#000000" TextStyle="" FontFamily="Arial" DecimalFormat="#0.0#####" LocaleLang="en" LocaleCountry="" LocaleVariant=""><DataId PieColor="#0000FF" PieCaption="">12.0</DataId><DataId PieColor="#FF0000" PieCaption="">12.1</DataId></DataIds></PieChartLabel><InvisibleData Id="12.1" Text="0.0" IsDecimal="true"></InvisibleData><InvisibleData Id="12.0" Text="1.0" IsDecimal="true"></InvisibleData></Branch><Node Text="Oxyporus P melanocephalus GornTaezhFE18" IsDecimal="false" UniqueName="1e4mv0vitg" TextColor="#000000" TextHeight="6.0" TextStyle="" FontFamily="Arial" DecimalFormat="#0.0#####" LocaleLang="en" LocaleCountry="" LocaleVariant="" LineColor="#000000" LineWidth="0.3" EdgeRadius="1.0"><LeafMargin Left="1.0" Top="0.3" Right="1.0" Bottom="0.3"></LeafMargin><Branch Length="0.001027396" LineColor="#000000" LineWidth="0.3" ConstantWidth="false" MinLength="4.0" MinSpaceAbove="0.0" MinSpaceBelow="0.0"></Branch></Node><Node Text="Oxyporus P melanocephalus larvaGornTaezhFE18" IsDecimal="false" UniqueName="oeb1l7me8d" TextColor="#000000" TextHeight="6.0" TextStyle="" FontFamily="Arial" DecimalFormat="#0.0#####" LocaleLang="en" LocaleCountry="" LocaleVariant="" LineColor="#000000" LineWidth="0.3" EdgeRadius="1.0"><LeafMargin Left="1.0" Top="0.3" Right="1.0" Bottom="0.3"></LeafMargin><Branch Length="0.001047888" LineColor="#000000" LineWidth="0.3" ConstantWidth="false" MinLength="4.0" MinSpaceAbove="0.0" MinSpaceBelow="0.0"></Branch></Node></Node><Node Text="Oxyporus P melanocephalus ListvFE19 30" IsDecimal="false" UniqueName="9y8knbw3dy" TextColor="#000000" TextHeight="6.0" TextStyle="" FontFamily="Arial" DecimalFormat="#0.0#####" LocaleLang="en" LocaleCountry="" LocaleVariant="" LineColor="#000000" LineWidth="0.3" EdgeRadius="1.0"><LeafMargin Left="1.0" Top="0.3" Right="1.0" Bottom="0.3"></LeafMargin><Branch Length="0.001237155" LineColor="#000000" LineWidth="0.3" ConstantWidth="false" MinLength="4.0" MinSpaceAbove="0.0" MinSpaceBelow="0.0"></Branch></Node></Node></Node></Node></Node><Node Text="internalNode14" IsDecimal="false" UniqueName="hx978ixmzt" TextColor="#000000" TextHeight="6.0" TextStyle="" FontFamily="Arial" DecimalFormat="#0.0#####" LocaleLang="en" LocaleCountry="" LocaleVariant="" LineColor="#000000" LineWidth="0.3" EdgeRadius="1.0"><LeafMargin Left="1.0" Top="0.3" Right="1.0" Bottom="0.3"></LeafMargin><Branch Length="0.07895561" LineColor="#000000" LineWidth="0.3" ConstantWidth="false" MinLength="4.0" MinSpaceAbove="0.0" MinSpaceBelow="0.0"><PieChartLabel TextColor="#000000" TextHeight="6.0" TextStyle="" FontFamily="Arial" DecimalFormat="#0.0#####" LocaleLang="en" LocaleCountry="" LocaleVariant="" LineColor="#000000" LineWidth="0.3" Width="6.0" Height="6.0" InternalLines="true" NullLines="false" ShowTitle="false" CaptionType="NONE" CaptionLinkType="STRAIGHT_LINES" Id="12" Above="true" LineNo="0" LinePos="0.0"><LabelMargin Left="1.0" Top="1.0" Right="1.0" Bottom="1.0"></LabelMargin><DataIds TextColor="#000000" TextStyle="" FontFamily="Arial" DecimalFormat="#0.0#####" LocaleLang="en" LocaleCountry="" LocaleVariant=""><DataId PieColor="#0000FF" PieCaption="">12.0</DataId><DataId PieColor="#FF0000" PieCaption="">12.1</DataId></DataIds></PieChartLabel><InvisibleData Id="12.1" Text="0.991411" IsDecimal="true"></InvisibleData><InvisibleData Id="12.0" Text="0.008589" IsDecimal="true"></InvisibleData></Branch><Node Text="internalNode15" IsDecimal="false" UniqueName="ypfulpqu73" TextColor="#000000" TextHeight="6.0" TextStyle="" FontFamily="Arial" DecimalFormat="#0.0#####" LocaleLang="en" LocaleCountry="" LocaleVariant="" LineColor="#000000" LineWidth="0.3" EdgeRadius="1.0"><LeafMargin Left="1.0" Top="0.3" Right="1.0" Bottom="0.3"></LeafMargin><Branch Length="0.02158817" LineColor="#000000" LineWidth="0.3" ConstantWidth="false" MinLength="4.0" MinSpaceAbove="0.0" MinSpaceBelow="0.0"><PieChartLabel TextColor="#000000" TextHeight="6.0" TextStyle="" FontFamily="Arial" DecimalFormat="#0.0#####" LocaleLang="en" LocaleCountry="" LocaleVariant="" LineColor="#000000" LineWidth="0.3" Width="6.0" Height="6.0" InternalLines="true" NullLines="false" ShowTitle="false" CaptionType="NONE" CaptionLinkType="STRAIGHT_LINES" Id="12" Above="true" LineNo="0" LinePos="0.0"><LabelMargin Left="1.0" Top="1.0" Right="1.0" Bottom="1.0"></LabelMargin><DataIds TextColor="#000000" TextStyle="" FontFamily="Arial" DecimalFormat="#0.0#####" LocaleLang="en" LocaleCountry="" LocaleVariant=""><DataId PieColor="#0000FF" PieCaption="">12.0</DataId><DataId PieColor="#FF0000" PieCaption="">12.1</DataId></DataIds></PieChartLabel><InvisibleData Id="12.1" Text="0.994697" IsDecimal="true"></InvisibleData><InvisibleData Id="12.0" Text="0.005303" IsDecimal="true"></InvisibleData></Branch><Node Text="internalNode16" IsDecimal="false" UniqueName="sczpz079nc" TextColor="#000000" TextHeight="6.0" TextStyle="" FontFamily="Arial" DecimalFormat="#0.0#####" LocaleLang="en" LocaleCountry="" LocaleVariant="" LineColor="#000000" LineWidth="0.3" EdgeRadius="1.0"><LeafMargin Left="1.0" Top="0.3" Right="1.0" Bottom="0.3"></LeafMargin><Branch Length="0.02634827" LineColor="#000000" LineWidth="0.3" ConstantWidth="false" MinLength="4.0" MinSpaceAbove="0.0" MinSpaceBelow="0.0"><PieChartLabel TextColor="#000000" TextHeight="6.0" TextStyle="" FontFamily="Arial" DecimalFormat="#0.0#####" LocaleLang="en" LocaleCountry="" LocaleVariant="" LineColor="#000000" LineWidth="0.3" Width="6.0" Height="6.0" InternalLines="true" NullLines="false" ShowTitle="false" CaptionType="NONE" CaptionLinkType="STRAIGHT_LINES" Id="12" Above="true" LineNo="0" LinePos="0.0"><LabelMargin Left="1.0" Top="1.0" Right="1.0" Bottom="1.0"></LabelMargin><DataIds TextColor="#000000" TextStyle="" FontFamily="Arial" DecimalFormat="#0.0#####" LocaleLang="en" LocaleCountry="" LocaleVariant=""><DataId PieColor="#0000FF" PieCaption="">12.0</DataId><DataId PieColor="#FF0000" PieCaption="">12.1</DataId></DataIds></PieChartLabel><InvisibleData Id="12.1" Text="0.996751" IsDecimal="true"></InvisibleData><InvisibleData Id="12.0" Text="0.003249" IsDecimal="true"></InvisibleData></Branch><Node Text="internalNode17" IsDecimal="false" UniqueName="uo0r706i2s" TextColor="#000000" TextHeight="6.0" TextStyle="" FontFamily="Arial" DecimalFormat="#0.0#####" LocaleLang="en" LocaleCountry="" LocaleVariant="" LineColor="#000000" LineWidth="0.3" EdgeRadius="1.0"><LeafMargin Left="1.0" Top="0.3" Right="1.0" Bottom="0.3"></LeafMargin><Branch Length="0.03898149" LineColor="#000000" LineWidth="0.3" ConstantWidth="false" MinLength="4.0" MinSpaceAbove="0.0" MinSpaceBelow="0.0"><PieChartLabel TextColor="#000000" TextHeight="6.0" TextStyle="" FontFamily="Arial" DecimalFormat="#0.0#####" LocaleLang="en" LocaleCountry="" LocaleVariant="" LineColor="#000000" LineWidth="0.3" Width="6.0" Height="6.0" InternalLines="true" NullLines="false" ShowTitle="false" CaptionType="NONE" CaptionLinkType="STRAIGHT_LINES" Id="12" Above="true" LineNo="0" LinePos="0.0"><LabelMargin Left="1.0" Top="1.0" Right="1.0" Bottom="1.0"></LabelMargin><DataIds TextColor="#000000" TextStyle="" FontFamily="Arial" DecimalFormat="#0.0#####" LocaleLang="en" LocaleCountry="" LocaleVariant=""><DataId PieColor="#0000FF" PieCaption="">12.0</DataId><DataId PieColor="#FF0000" PieCaption="">12.1</DataId></DataIds></PieChartLabel><InvisibleData Id="12.1" Text="0.999997" IsDecimal="true"></InvisibleData><InvisibleData Id="12.0" Text="3.0E-6" IsDecimal="true"></InvisibleData></Branch><Node Text="internalNode18" IsDecimal="false" UniqueName="z6f5a5xu65" TextColor="#000000" TextHeight="6.0" TextStyle="" FontFamily="Arial" DecimalFormat="#0.0#####" LocaleLang="en" LocaleCountry="" LocaleVariant="" LineColor="#000000" LineWidth="0.3" EdgeRadius="1.0"><LeafMargin Left="1.0" Top="0.3" Right="1.0" Bottom="0.3"></LeafMargin><Branch Length="0.007755554" LineColor="#000000" LineWidth="0.3" ConstantWidth="false" MinLength="4.0" MinSpaceAbove="0.0" MinSpaceBelow="0.0"><PieChartLabel TextColor="#000000" TextHeight="6.0" TextStyle="" FontFamily="Arial" DecimalFormat="#0.0#####" LocaleLang="en" LocaleCountry="" LocaleVariant="" LineColor="#000000" LineWidth="0.3" Width="6.0" Height="6.0" InternalLines="true" NullLines="false" ShowTitle="false" CaptionType="NONE" CaptionLinkType="STRAIGHT_LINES" Id="12" Above="true" LineNo="0" LinePos="0.0"><LabelMargin Left="1.0" Top="1.0" Right="1.0" Bottom="1.0"></LabelMargin><DataIds TextColor="#000000" TextStyle="" FontFamily="Arial" DecimalFormat="#0.0#####" LocaleLang="en" LocaleCountry="" LocaleVariant=""><DataId PieColor="#0000FF" PieCaption="">12.0</DataId><DataId PieColor="#FF0000" PieCaption="">12.1</DataId></DataIds></PieChartLabel><InvisibleData Id="12.1" Text="1.0" IsDecimal="true"></InvisibleData><InvisibleData Id="12.0" Text="0.0" IsDecimal="true"></InvisibleData></Branch><Node Text="internalNode19" IsDecimal="false" UniqueName="srwmq4qwkg" TextColor="#000000" TextHeight="6.0" TextStyle="" FontFamily="Arial" DecimalFormat="#0.0#####" LocaleLang="en" LocaleCountry="" LocaleVariant="" LineColor="#000000" LineWidth="0.3" EdgeRadius="1.0"><LeafMargin Left="1.0" Top="0.3" Right="1.0" Bottom="0.3"></LeafMargin><Branch Length="0.002429392" LineColor="#000000" LineWidth="0.3" ConstantWidth="false" MinLength="4.0" MinSpaceAbove="0.0" MinSpaceBelow="0.0"><PieChartLabel TextColor="#000000" TextHeight="6.0" TextStyle="" FontFamily="Arial" DecimalFormat="#0.0#####" LocaleLang="en" LocaleCountry="" LocaleVariant="" LineColor="#000000" LineWidth="0.3" Width="6.0" Height="6.0" InternalLines="true" NullLines="false" ShowTitle="false" CaptionType="NONE" CaptionLinkType="STRAIGHT_LINES" Id="12" Above="true" LineNo="0" LinePos="0.0"><LabelMargin Left="1.0" Top="1.0" Right="1.0" Bottom="1.0"></LabelMargin><DataIds TextColor="#000000" TextStyle="" FontFamily="Arial" DecimalFormat="#0.0#####" LocaleLang="en" LocaleCountry="" LocaleVariant=""><DataId PieColor="#0000FF" PieCaption="">12.0</DataId><DataId PieColor="#FF0000" PieCaption="">12.1</DataId></DataIds></PieChartLabel><InvisibleData Id="12.1" Text="1.0" IsDecimal="true"></InvisibleData><InvisibleData Id="12.0" Text="0.0" IsDecimal="true"></InvisibleData></Branch><Node Text="Oxyporus aequicollis PogranFE19 33" IsDecimal="false" UniqueName="47oc2guxzu" TextColor="#000000" TextHeight="6.0" TextStyle="" FontFamily="Arial" DecimalFormat="#0.0#####" LocaleLang="en" LocaleCountry="" LocaleVariant="" LineColor="#000000" LineWidth="0.3" EdgeRadius="1.0"><LeafMargin Left="1.0" Top="0.3" Right="1.0" Bottom="0.3"></LeafMargin><Branch Length="0.001060335" LineColor="#000000" LineWidth="0.3" ConstantWidth="false" MinLength="4.0" MinSpaceAbove="0.0" MinSpaceBelow="0.0"></Branch></Node><Node Text="Oxyporus aequicollis small PogranFE19 43" IsDecimal="false" UniqueName="pi5ay0eu5s" TextColor="#000000" TextHeight="6.0" TextStyle="" FontFamily="Arial" DecimalFormat="#0.0#####" LocaleLang="en" LocaleCountry="" LocaleVariant="" LineColor="#000000" LineWidth="0.3" EdgeRadius="1.0"><LeafMargin Left="1.0" Top="0.3" Right="1.0" Bottom="0.3"></LeafMargin><Branch Length="0.001055718" LineColor="#000000" LineWidth="0.3" ConstantWidth="false" MinLength="4.0" MinSpaceAbove="0.0" MinSpaceBelow="0.0"></Branch></Node><Node Text="Oxyporus germanus PogranFE19 40" IsDecimal="false" UniqueName="o28ugjho7t" TextColor="#000000" TextHeight="6.0" TextStyle="" FontFamily="Arial" DecimalFormat="#0.0#####" LocaleLang="en" LocaleCountry="" LocaleVariant="" LineColor="#000000" LineWidth="0.3" EdgeRadius="1.0"><LeafMargin Left="1.0" Top="0.3" Right="1.0" Bottom="0.3"></LeafMargin><Branch Length="0.004064341" LineColor="#000000" LineWidth="0.3" ConstantWidth="false" MinLength="4.0" MinSpaceAbove="0.0" MinSpaceBelow="0.0"></Branch></Node></Node><Node Text="Oxyporus basicornis Buryatia19 13" IsDecimal="false" UniqueName="ac2xbq24e8" TextColor="#000000" TextHeight="6.0" TextStyle="" FontFamily="Arial" DecimalFormat="#0.0#####" LocaleLang="en" LocaleCountry="" LocaleVariant="" LineColor="#000000" LineWidth="0.3" EdgeRadius="1.0"><LeafMargin Left="1.0" Top="0.3" Right="1.0" Bottom="0.3"></LeafMargin><Branch Length="0.001015554" LineColor="#000000" LineWidth="0.3" ConstantWidth="false" MinLength="4.0" MinSpaceAbove="0.0" MinSpaceBelow="0.0"></Branch></Node><Node Text="Oxyporus basicornis GornTaezhFE18 19" IsDecimal="false" UniqueName="bm7nas6a6v" TextColor="#000000" TextHeight="6.0" TextStyle="" FontFamily="Arial" DecimalFormat="#0.0#####" LocaleLang="en" LocaleCountry="" LocaleVariant="" LineColor="#000000" LineWidth="0.3" EdgeRadius="1.0"><LeafMargin Left="1.0" Top="0.3" Right="1.0" Bottom="0.3"></LeafMargin><Branch Length="0.001021344" LineColor="#000000" LineWidth="0.3" ConstantWidth="false" MinLength="4.0" MinSpaceAbove="0.0" MinSpaceBelow="0.0"></Branch></Node><Node Text="Oxyporus basicornis GornTaezhFE18 38" IsDecimal="false" UniqueName="d2c1cmt0id" TextColor="#000000" TextHeight="6.0" TextStyle="" FontFamily="Arial" DecimalFormat="#0.0#####" LocaleLang="en" LocaleCountry="" LocaleVariant="" LineColor="#000000" LineWidth="0.3" EdgeRadius="1.0"><LeafMargin Left="1.0" Top="0.3" Right="1.0" Bottom="0.3"></LeafMargin><Branch Length="0.001071998" LineColor="#000000" LineWidth="0.3" ConstantWidth="false" MinLength="4.0" MinSpaceAbove="0.0" MinSpaceBelow="0.0"></Branch></Node><Node Text="Oxyporus basicornis PogranFE19 42" IsDecimal="false" UniqueName="7ncsg8ecm3" TextColor="#000000" TextHeight="6.0" TextStyle="" FontFamily="Arial" DecimalFormat="#0.0#####" LocaleLang="en" LocaleCountry="" LocaleVariant="" LineColor="#000000" LineWidth="0.3" EdgeRadius="1.0"><LeafMargin Left="1.0" Top="0.3" Right="1.0" Bottom="0.3"></LeafMargin><Branch Length="0.001042375" LineColor="#000000" LineWidth="0.3" ConstantWidth="false" MinLength="4.0" MinSpaceAbove="0.0" MinSpaceBelow="0.0"></Branch></Node><Node Text="Oxyporus basicornis PogranFE19 50" IsDecimal="false" UniqueName="0xatwxcl23" TextColor="#000000" TextHeight="6.0" TextStyle="" FontFamily="Arial" DecimalFormat="#0.0#####" LocaleLang="en" LocaleCountry="" LocaleVariant="" LineColor="#000000" LineWidth="0.3" EdgeRadius="1.0"><LeafMargin Left="1.0" Top="0.3" Right="1.0" Bottom="0.3"></LeafMargin><Branch Length="0.001104173" LineColor="#000000" LineWidth="0.3" ConstantWidth="false" MinLength="4.0" MinSpaceAbove="0.0" MinSpaceBelow="0.0"></Branch></Node></Node><Node Text="internalNode20" IsDecimal="false" UniqueName="b5c9bcnl6s" TextColor="#000000" TextHeight="6.0" TextStyle="" FontFamily="Arial" DecimalFormat="#0.0#####" LocaleLang="en" LocaleCountry="" LocaleVariant="" LineColor="#000000" LineWidth="0.3" EdgeRadius="1.0"><LeafMargin Left="1.0" Top="0.3" Right="1.0" Bottom="0.3"></LeafMargin><Branch Length="0.008685141" LineColor="#000000" LineWidth="0.3" ConstantWidth="false" MinLength="4.0" MinSpaceAbove="0.0" MinSpaceBelow="0.0"><PieChartLabel TextColor="#000000" TextHeight="6.0" TextStyle="" FontFamily="Arial" DecimalFormat="#0.0#####" LocaleLang="en" LocaleCountry="" LocaleVariant="" LineColor="#000000" LineWidth="0.3" Width="6.0" Height="6.0" InternalLines="true" NullLines="false" ShowTitle="false" CaptionType="NONE" CaptionLinkType="STRAIGHT_LINES" Id="12" Above="true" LineNo="0" LinePos="0.0"><LabelMargin Left="1.0" Top="1.0" Right="1.0" Bottom="1.0"></LabelMargin><DataIds TextColor="#000000" TextStyle="" FontFamily="Arial" DecimalFormat="#0.0#####" LocaleLang="en" LocaleCountry="" LocaleVariant=""><DataId PieColor="#0000FF" PieCaption="">12.0</DataId><DataId PieColor="#FF0000" PieCaption="">12.1</DataId></DataIds></PieChartLabel><InvisibleData Id="12.1" Text="0.999941" IsDecimal="true"></InvisibleData><InvisibleData Id="12.0" Text="5.9E-5" IsDecimal="true"></InvisibleData></Branch><Node Text="internalNode21" IsDecimal="false" UniqueName="1cvkzca7sx" TextColor="#000000" TextHeight="6.0" TextStyle="" FontFamily="Arial" DecimalFormat="#0.0#####" LocaleLang="en" LocaleCountry="" LocaleVariant="" LineColor="#000000" LineWidth="0.3" EdgeRadius="1.0"><LeafMargin Left="1.0" Top="0.3" Right="1.0" Bottom="0.3"></LeafMargin><Branch Length="0.003971854" LineColor="#000000" LineWidth="0.3" ConstantWidth="false" MinLength="4.0" MinSpaceAbove="0.0" MinSpaceBelow="0.0"><PieChartLabel TextColor="#000000" TextHeight="6.0" TextStyle="" FontFamily="Arial" DecimalFormat="#0.0#####" LocaleLang="en" LocaleCountry="" LocaleVariant="" LineColor="#000000" LineWidth="0.3" Width="6.0" Height="6.0" InternalLines="true" NullLines="false" ShowTitle="false" CaptionType="NONE" CaptionLinkType="STRAIGHT_LINES" Id="12" Above="true" LineNo="0" LinePos="0.0"><LabelMargin Left="1.0" Top="1.0" Right="1.0" Bottom="1.0"></LabelMargin><DataIds TextColor="#000000" TextStyle="" FontFamily="Arial" DecimalFormat="#0.0#####" LocaleLang="en" LocaleCountry="" LocaleVariant=""><DataId PieColor="#0000FF" PieCaption="">12.0</DataId><DataId PieColor="#FF0000" PieCaption="">12.1</DataId></DataIds></PieChartLabel><InvisibleData Id="12.1" Text="1.0" IsDecimal="true"></InvisibleData><InvisibleData Id="12.0" Text="0.0" IsDecimal="true"></InvisibleData></Branch><Node Text="internalNode22" IsDecimal="false" UniqueName="k18el7eex6" TextColor="#000000" TextHeight="6.0" TextStyle="" FontFamily="Arial" DecimalFormat="#0.0#####" LocaleLang="en" LocaleCountry="" LocaleVariant="" LineColor="#000000" LineWidth="0.3" EdgeRadius="1.0"><LeafMargin Left="1.0" Top="0.3" Right="1.0" Bottom="0.3"></LeafMargin><Branch Length="0.003874716" LineColor="#000000" LineWidth="0.3" ConstantWidth="false" MinLength="4.0" MinSpaceAbove="0.0" MinSpaceBelow="0.0"><PieChartLabel TextColor="#000000" TextHeight="6.0" TextStyle="" FontFamily="Arial" DecimalFormat="#0.0#####" LocaleLang="en" LocaleCountry="" LocaleVariant="" LineColor="#000000" LineWidth="0.3" Width="6.0" Height="6.0" InternalLines="true" NullLines="false" ShowTitle="false" CaptionType="NONE" CaptionLinkType="STRAIGHT_LINES" Id="12" Above="true" LineNo="0" LinePos="0.0"><LabelMargin Left="1.0" Top="1.0" Right="1.0" Bottom="1.0"></LabelMargin><DataIds TextColor="#000000" TextStyle="" FontFamily="Arial" DecimalFormat="#0.0#####" LocaleLang="en" LocaleCountry="" LocaleVariant=""><DataId PieColor="#0000FF" PieCaption="">12.0</DataId><DataId PieColor="#FF0000" PieCaption="">12.1</DataId></DataIds></PieChartLabel><InvisibleData Id="12.1" Text="0.999976" IsDecimal="true"></InvisibleData><InvisibleData Id="12.0" Text="2.4E-5" IsDecimal="true"></InvisibleData></Branch><Node Text="Oxyporus basicornis PosietFE19 39" IsDecimal="false" UniqueName="7hgbu8z000" TextColor="#000000" TextHeight="6.0" TextStyle="" FontFamily="Arial" DecimalFormat="#0.0#####" LocaleLang="en" LocaleCountry="" LocaleVariant="" LineColor="#000000" LineWidth="0.3" EdgeRadius="1.0"><LeafMargin Left="1.0" Top="0.3" Right="1.0" Bottom="0.3"></LeafMargin><Branch Length="0.001308245" LineColor="#000000" LineWidth="0.3" ConstantWidth="false" MinLength="4.0" MinSpaceAbove="0.0" MinSpaceBelow="0.0"></Branch></Node><Node Text="Oxyporus germanus PosietFE19 11" IsDecimal="false" UniqueName="976xvttmby" TextColor="#000000" TextHeight="6.0" TextStyle="" FontFamily="Arial" DecimalFormat="#0.0#####" LocaleLang="en" LocaleCountry="" LocaleVariant="" LineColor="#000000" LineWidth="0.3" EdgeRadius="1.0"><LeafMargin Left="1.0" Top="0.3" Right="1.0" Bottom="0.3"></LeafMargin><Branch Length="0.003542844" LineColor="#000000" LineWidth="0.3" ConstantWidth="false" MinLength="4.0" MinSpaceAbove="0.0" MinSpaceBelow="0.0"></Branch></Node></Node><Node Text="internalNode23" IsDecimal="false" UniqueName="q0sinssm50" TextColor="#000000" TextHeight="6.0" TextStyle="" FontFamily="Arial" DecimalFormat="#0.0#####" LocaleLang="en" LocaleCountry="" LocaleVariant="" LineColor="#000000" LineWidth="0.3" EdgeRadius="1.0"><LeafMargin Left="1.0" Top="0.3" Right="1.0" Bottom="0.3"></LeafMargin><Branch Length="0.005949093" LineColor="#000000" LineWidth="0.3" ConstantWidth="false" MinLength="4.0" MinSpaceAbove="0.0" MinSpaceBelow="0.0"><PieChartLabel TextColor="#000000" TextHeight="6.0" TextStyle="" FontFamily="Arial" DecimalFormat="#0.0#####" LocaleLang="en" LocaleCountry="" LocaleVariant="" LineColor="#000000" LineWidth="0.3" Width="6.0" Height="6.0" InternalLines="true" NullLines="false" ShowTitle="false" CaptionType="NONE" CaptionLinkType="STRAIGHT_LINES" Id="12" Above="true" LineNo="0" LinePos="0.0"><LabelMargin Left="1.0" Top="1.0" Right="1.0" Bottom="1.0"></LabelMargin><DataIds TextColor="#000000" TextStyle="" FontFamily="Arial" DecimalFormat="#0.0#####" LocaleLang="en" LocaleCountry="" LocaleVariant=""><DataId PieColor="#0000FF" PieCaption="">12.0</DataId><DataId PieColor="#FF0000" PieCaption="">12.1</DataId></DataIds></PieChartLabel><InvisibleData Id="12.1" Text="0.999984" IsDecimal="true"></InvisibleData><InvisibleData Id="12.0" Text="1.6E-5" IsDecimal="true"></InvisibleData></Branch><Node Text="internalNode24" IsDecimal="false" UniqueName="hkjkh5pi4l" TextColor="#000000" TextHeight="6.0" TextStyle="" FontFamily="Arial" DecimalFormat="#0.0#####" LocaleLang="en" LocaleCountry="" LocaleVariant="" LineColor="#000000" LineWidth="0.3" EdgeRadius="1.0"><LeafMargin Left="1.0" Top="0.3" Right="1.0" Bottom="0.3"></LeafMargin><Branch Length="0.002467292" LineColor="#000000" LineWidth="0.3" ConstantWidth="false" MinLength="4.0" MinSpaceAbove="0.0" MinSpaceBelow="0.0"><PieChartLabel TextColor="#000000" TextHeight="6.0" TextStyle="" FontFamily="Arial" DecimalFormat="#0.0#####" LocaleLang="en" LocaleCountry="" LocaleVariant="" LineColor="#000000" LineWidth="0.3" Width="6.0" Height="6.0" InternalLines="true" NullLines="false" ShowTitle="false" CaptionType="NONE" CaptionLinkType="STRAIGHT_LINES" Id="12" Above="true" LineNo="0" LinePos="0.0"><LabelMargin Left="1.0" Top="1.0" Right="1.0" Bottom="1.0"></LabelMargin><DataIds TextColor="#000000" TextStyle="" FontFamily="Arial" DecimalFormat="#0.0#####" LocaleLang="en" LocaleCountry="" LocaleVariant=""><DataId PieColor="#0000FF" PieCaption="">12.0</DataId><DataId PieColor="#FF0000" PieCaption="">12.1</DataId></DataIds></PieChartLabel><InvisibleData Id="12.1" Text="0.999965" IsDecimal="true"></InvisibleData><InvisibleData Id="12.0" Text="3.5E-5" IsDecimal="true"></InvisibleData></Branch><Node Text="Oxyporus parvus1 CNUIC588" IsDecimal="false" UniqueName="krd22u8l6z" TextColor="#000000" TextHeight="6.0" TextStyle="" FontFamily="Arial" DecimalFormat="#0.0#####" LocaleLang="en" LocaleCountry="" LocaleVariant="" LineColor="#000000" LineWidth="0.3" EdgeRadius="1.0"><LeafMargin Left="1.0" Top="0.3" Right="1.0" Bottom="0.3"></LeafMargin><Branch Length="0.00248024" LineColor="#000000" LineWidth="0.3" ConstantWidth="false" MinLength="4.0" MinSpaceAbove="0.0" MinSpaceBelow="0.0"></Branch></Node><Node Text="Oxyporus parvus2 CNUIC601" IsDecimal="false" UniqueName="oagbecdgyl" TextColor="#000000" TextHeight="6.0" TextStyle="" FontFamily="Arial" DecimalFormat="#0.0#####" LocaleLang="en" LocaleCountry="" LocaleVariant="" LineColor="#000000" LineWidth="0.3" EdgeRadius="1.0"><LeafMargin Left="1.0" Top="0.3" Right="1.0" Bottom="0.3"></LeafMargin><Branch Length="0.002749748" LineColor="#000000" LineWidth="0.3" ConstantWidth="false" MinLength="4.0" MinSpaceAbove="0.0" MinSpaceBelow="0.0"></Branch></Node></Node><Node Text="Oxyporus parvus5 CNUIC604" IsDecimal="false" UniqueName="4dhxhmriy1" TextColor="#000000" TextHeight="6.0" TextStyle="" FontFamily="Arial" DecimalFormat="#0.0#####" LocaleLang="en" LocaleCountry="" LocaleVariant="" LineColor="#000000" LineWidth="0.3" EdgeRadius="1.0"><LeafMargin Left="1.0" Top="0.3" Right="1.0" Bottom="0.3"></LeafMargin><Branch Length="0.001248784" LineColor="#000000" LineWidth="0.3" ConstantWidth="false" MinLength="4.0" MinSpaceAbove="0.0" MinSpaceBelow="0.0"></Branch></Node></Node><Node Text="Oxyporus parvus4 CNUIC603" IsDecimal="false" UniqueName="jr8dkseqz4" TextColor="#000000" TextHeight="6.0" TextStyle="" FontFamily="Arial" DecimalFormat="#0.0#####" LocaleLang="en" LocaleCountry="" LocaleVariant="" LineColor="#000000" LineWidth="0.3" EdgeRadius="1.0"><LeafMargin Left="1.0" Top="0.3" Right="1.0" Bottom="0.3"></LeafMargin><Branch Length="0.001062062" LineColor="#000000" LineWidth="0.3" ConstantWidth="false" MinLength="4.0" MinSpaceAbove="0.0" MinSpaceBelow="0.0"></Branch></Node><Node Text="Oxyporus parvus7 CNUIC606" IsDecimal="false" UniqueName="na6ptfqqet" TextColor="#000000" TextHeight="6.0" TextStyle="" FontFamily="Arial" DecimalFormat="#0.0#####" LocaleLang="en" LocaleCountry="" LocaleVariant="" LineColor="#000000" LineWidth="0.3" EdgeRadius="1.0"><LeafMargin Left="1.0" Top="0.3" Right="1.0" Bottom="0.3"></LeafMargin><Branch Length="0.0060031" LineColor="#000000" LineWidth="0.3" ConstantWidth="false" MinLength="4.0" MinSpaceAbove="0.0" MinSpaceBelow="0.0"></Branch></Node><Node Text="Oxyporus parvus8 CNUIC632" IsDecimal="false" UniqueName="h305y3tr2a" TextColor="#000000" TextHeight="6.0" TextStyle="" FontFamily="Arial" DecimalFormat="#0.0#####" LocaleLang="en" LocaleCountry="" LocaleVariant="" LineColor="#000000" LineWidth="0.3" EdgeRadius="1.0"><LeafMargin Left="1.0" Top="0.3" Right="1.0" Bottom="0.3"></LeafMargin><Branch Length="0.002590715" LineColor="#000000" LineWidth="0.3" ConstantWidth="false" MinLength="4.0" MinSpaceAbove="0.0" MinSpaceBelow="0.0"></Branch></Node></Node><Node Text="Oxyporus parvus6 CNUIC605" IsDecimal="false" UniqueName="1w0hxj5tyx" TextColor="#000000" TextHeight="6.0" TextStyle="" FontFamily="Arial" DecimalFormat="#0.0#####" LocaleLang="en" LocaleCountry="" LocaleVariant="" LineColor="#000000" LineWidth="0.3" EdgeRadius="1.0"><LeafMargin Left="1.0" Top="0.3" Right="1.0" Bottom="0.3"></LeafMargin><Branch Length="0.002910179" LineColor="#000000" LineWidth="0.3" ConstantWidth="false" MinLength="4.0" MinSpaceAbove="0.0" MinSpaceBelow="0.0"></Branch></Node></Node><Node Text="internalNode25" IsDecimal="false" UniqueName="iwyb5l0vt8" TextColor="#000000" TextHeight="6.0" TextStyle="" FontFamily="Arial" DecimalFormat="#0.0#####" LocaleLang="en" LocaleCountry="" LocaleVariant="" LineColor="#000000" LineWidth="0.3" EdgeRadius="1.0"><LeafMargin Left="1.0" Top="0.3" Right="1.0" Bottom="0.3"></LeafMargin><Branch Length="0.004202501" LineColor="#000000" LineWidth="0.3" ConstantWidth="false" MinLength="4.0" MinSpaceAbove="0.0" MinSpaceBelow="0.0"><PieChartLabel TextColor="#000000" TextHeight="6.0" TextStyle="" FontFamily="Arial" DecimalFormat="#0.0#####" LocaleLang="en" LocaleCountry="" LocaleVariant="" LineColor="#000000" LineWidth="0.3" Width="6.0" Height="6.0" InternalLines="true" NullLines="false" ShowTitle="false" CaptionType="NONE" CaptionLinkType="STRAIGHT_LINES" Id="12" Above="true" LineNo="0" LinePos="0.0"><LabelMargin Left="1.0" Top="1.0" Right="1.0" Bottom="1.0"></LabelMargin><DataIds TextColor="#000000" TextStyle="" FontFamily="Arial" DecimalFormat="#0.0#####" LocaleLang="en" LocaleCountry="" LocaleVariant=""><DataId PieColor="#0000FF" PieCaption="">12.0</DataId><DataId PieColor="#FF0000" PieCaption="">12.1</DataId></DataIds></PieChartLabel><InvisibleData Id="12.1" Text="0.999994" IsDecimal="true"></InvisibleData><InvisibleData Id="12.0" Text="6.0E-6" IsDecimal="true"></InvisibleData></Branch><Node Text="Oxyporus parvus10 CNUIC639" IsDecimal="false" UniqueName="637gg14mbl" TextColor="#000000" TextHeight="6.0" TextStyle="" FontFamily="Arial" DecimalFormat="#0.0#####" LocaleLang="en" LocaleCountry="" LocaleVariant="" LineColor="#000000" LineWidth="0.3" EdgeRadius="1.0"><LeafMargin Left="1.0" Top="0.3" Right="1.0" Bottom="0.3"></LeafMargin><Branch Length="0.001059266" LineColor="#000000" LineWidth="0.3" ConstantWidth="false" MinLength="4.0" MinSpaceAbove="0.0" MinSpaceBelow="0.0"></Branch></Node><Node Text="Oxyporus parvus3 CNUIC602" IsDecimal="false" UniqueName="30is10lgab" TextColor="#000000" TextHeight="6.0" TextStyle="" FontFamily="Arial" DecimalFormat="#0.0#####" LocaleLang="en" LocaleCountry="" LocaleVariant="" LineColor="#000000" LineWidth="0.3" EdgeRadius="1.0"><LeafMargin Left="1.0" Top="0.3" Right="1.0" Bottom="0.3"></LeafMargin><Branch Length="0.00107293" LineColor="#000000" LineWidth="0.3" ConstantWidth="false" MinLength="4.0" MinSpaceAbove="0.0" MinSpaceBelow="0.0"></Branch></Node></Node></Node><Node Text="internalNode26" IsDecimal="false" UniqueName="kcqbxujo8p" TextColor="#000000" TextHeight="6.0" TextStyle="" FontFamily="Arial" DecimalFormat="#0.0#####" LocaleLang="en" LocaleCountry="" LocaleVariant="" LineColor="#000000" LineWidth="0.3" EdgeRadius="1.0"><LeafMargin Left="1.0" Top="0.3" Right="1.0" Bottom="0.3"></LeafMargin><Branch Length="0.01567575" LineColor="#000000" LineWidth="0.3" ConstantWidth="false" MinLength="4.0" MinSpaceAbove="0.0" MinSpaceBelow="0.0"><PieChartLabel TextColor="#000000" TextHeight="6.0" TextStyle="" FontFamily="Arial" DecimalFormat="#0.0#####" LocaleLang="en" LocaleCountry="" LocaleVariant="" LineColor="#000000" LineWidth="0.3" Width="6.0" Height="6.0" InternalLines="true" NullLines="false" ShowTitle="false" CaptionType="NONE" CaptionLinkType="STRAIGHT_LINES" Id="12" Above="true" LineNo="0" LinePos="0.0"><LabelMargin Left="1.0" Top="1.0" Right="1.0" Bottom="1.0"></LabelMargin><DataIds TextColor="#000000" TextStyle="" FontFamily="Arial" DecimalFormat="#0.0#####" LocaleLang="en" LocaleCountry="" LocaleVariant=""><DataId PieColor="#0000FF" PieCaption="">12.0</DataId><DataId PieColor="#FF0000" PieCaption="">12.1</DataId></DataIds></PieChartLabel><InvisibleData Id="12.1" Text="0.996541" IsDecimal="true"></InvisibleData><InvisibleData Id="12.0" Text="0.003459" IsDecimal="true"></InvisibleData></Branch><Node Text="internalNode27" IsDecimal="false" UniqueName="45ropvlqh0" TextColor="#000000" TextHeight="6.0" TextStyle="" FontFamily="Arial" DecimalFormat="#0.0#####" LocaleLang="en" LocaleCountry="" LocaleVariant="" LineColor="#000000" LineWidth="0.3" EdgeRadius="1.0"><LeafMargin Left="1.0" Top="0.3" Right="1.0" Bottom="0.3"></LeafMargin><Branch Length="0.0132556" LineColor="#000000" LineWidth="0.3" ConstantWidth="false" MinLength="4.0" MinSpaceAbove="0.0" MinSpaceBelow="0.0"><PieChartLabel TextColor="#000000" TextHeight="6.0" TextStyle="" FontFamily="Arial" DecimalFormat="#0.0#####" LocaleLang="en" LocaleCountry="" LocaleVariant="" LineColor="#000000" LineWidth="0.3" Width="6.0" Height="6.0" InternalLines="true" NullLines="false" ShowTitle="false" CaptionType="NONE" CaptionLinkType="STRAIGHT_LINES" Id="12" Above="true" LineNo="0" LinePos="0.0"><LabelMargin Left="1.0" Top="1.0" Right="1.0" Bottom="1.0"></LabelMargin><DataIds TextColor="#000000" TextStyle="" FontFamily="Arial" DecimalFormat="#0.0#####" LocaleLang="en" LocaleCountry="" LocaleVariant=""><DataId PieColor="#0000FF" PieCaption="">12.0</DataId><DataId PieColor="#FF0000" PieCaption="">12.1</DataId></DataIds></PieChartLabel><InvisibleData Id="12.1" Text="0.997961" IsDecimal="true"></InvisibleData><InvisibleData Id="12.0" Text="0.002039" IsDecimal="true"></InvisibleData></Branch><Node Text="internalNode28" IsDecimal="false" UniqueName="jb11w8io2t" TextColor="#000000" TextHeight="6.0" TextStyle="" FontFamily="Arial" DecimalFormat="#0.0#####" LocaleLang="en" LocaleCountry="" LocaleVariant="" LineColor="#000000" LineWidth="0.3" EdgeRadius="1.0"><LeafMargin Left="1.0" Top="0.3" Right="1.0" Bottom="0.3"></LeafMargin><Branch Length="0.01488225" LineColor="#000000" LineWidth="0.3" ConstantWidth="false" MinLength="4.0" MinSpaceAbove="0.0" MinSpaceBelow="0.0"><PieChartLabel TextColor="#000000" TextHeight="6.0" TextStyle="" FontFamily="Arial" DecimalFormat="#0.0#####" LocaleLang="en" LocaleCountry="" LocaleVariant="" LineColor="#000000" LineWidth="0.3" Width="6.0" Height="6.0" InternalLines="true" NullLines="false" ShowTitle="false" CaptionType="NONE" CaptionLinkType="STRAIGHT_LINES" Id="12" Above="true" LineNo="0" LinePos="0.0"><LabelMargin Left="1.0" Top="1.0" Right="1.0" Bottom="1.0"></LabelMargin><DataIds TextColor="#000000" TextStyle="" FontFamily="Arial" DecimalFormat="#0.0#####" LocaleLang="en" LocaleCountry="" LocaleVariant=""><DataId PieColor="#0000FF" PieCaption="">12.0</DataId><DataId PieColor="#FF0000" PieCaption="">12.1</DataId></DataIds></PieChartLabel><InvisibleData Id="12.1" Text="1.0" IsDecimal="true"></InvisibleData><InvisibleData Id="12.0" Text="0.0" IsDecimal="true"></InvisibleData></Branch><Node Text="internalNode29" IsDecimal="false" UniqueName="44btujyh4t" TextColor="#000000" TextHeight="6.0" TextStyle="" FontFamily="Arial" DecimalFormat="#0.0#####" LocaleLang="en" LocaleCountry="" LocaleVariant="" LineColor="#000000" LineWidth="0.3" EdgeRadius="1.0"><LeafMargin Left="1.0" Top="0.3" Right="1.0" Bottom="0.3"></LeafMargin><Branch Length="0.002466102" LineColor="#000000" LineWidth="0.3" ConstantWidth="false" MinLength="4.0" MinSpaceAbove="0.0" MinSpaceBelow="0.0"><PieChartLabel TextColor="#000000" TextHeight="6.0" TextStyle="" FontFamily="Arial" DecimalFormat="#0.0#####" LocaleLang="en" LocaleCountry="" LocaleVariant="" LineColor="#000000" LineWidth="0.3" Width="6.0" Height="6.0" InternalLines="true" NullLines="false" ShowTitle="false" CaptionType="NONE" CaptionLinkType="STRAIGHT_LINES" Id="12" Above="true" LineNo="0" LinePos="0.0"><LabelMargin Left="1.0" Top="1.0" Right="1.0" Bottom="1.0"></LabelMargin><DataIds TextColor="#000000" TextStyle="" FontFamily="Arial" DecimalFormat="#0.0#####" LocaleLang="en" LocaleCountry="" LocaleVariant=""><DataId PieColor="#0000FF" PieCaption="">12.0</DataId><DataId PieColor="#FF0000" PieCaption="">12.1</DataId></DataIds></PieChartLabel><InvisibleData Id="12.1" Text="1.0" IsDecimal="true"></InvisibleData><InvisibleData Id="12.0" Text="0.0" IsDecimal="true"></InvisibleData></Branch><Node Text="internalNode30" IsDecimal="false" UniqueName="0vf9tlxrtk" TextColor="#000000" TextHeight="6.0" TextStyle="" FontFamily="Arial" DecimalFormat="#0.0#####" LocaleLang="en" LocaleCountry="" LocaleVariant="" LineColor="#000000" LineWidth="0.3" EdgeRadius="1.0"><LeafMargin Left="1.0" Top="0.3" Right="1.0" Bottom="0.3"></LeafMargin><Branch Length="0.003365055" LineColor="#000000" LineWidth="0.3" ConstantWidth="false" MinLength="4.0" MinSpaceAbove="0.0" MinSpaceBelow="0.0"><PieChartLabel TextColor="#000000" TextHeight="6.0" TextStyle="" FontFamily="Arial" DecimalFormat="#0.0#####" LocaleLang="en" LocaleCountry="" LocaleVariant="" LineColor="#000000" LineWidth="0.3" Width="6.0" Height="6.0" InternalLines="true" NullLines="false" ShowTitle="false" CaptionType="NONE" CaptionLinkType="STRAIGHT_LINES" Id="12" Above="true" LineNo="0" LinePos="0.0"><LabelMargin Left="1.0" Top="1.0" Right="1.0" Bottom="1.0"></LabelMargin><DataIds TextColor="#000000" TextStyle="" FontFamily="Arial" DecimalFormat="#0.0#####" LocaleLang="en" LocaleCountry="" LocaleVariant=""><DataId PieColor="#0000FF" PieCaption="">12.0</DataId><DataId PieColor="#FF0000" PieCaption="">12.1</DataId></DataIds></PieChartLabel><InvisibleData Id="12.1" Text="0.99995" IsDecimal="true"></InvisibleData><InvisibleData Id="12.0" Text="5.0E-5" IsDecimal="true"></InvisibleData></Branch><Node Text="internalNode31" IsDecimal="false" UniqueName="6ylzkzp9zc" TextColor="#000000" TextHeight="6.0" TextStyle="" FontFamily="Arial" DecimalFormat="#0.0#####" LocaleLang="en" LocaleCountry="" LocaleVariant="" LineColor="#000000" LineWidth="0.3" EdgeRadius="1.0"><LeafMargin Left="1.0" Top="0.3" Right="1.0" Bottom="0.3"></LeafMargin><Branch Length="0.004087485" LineColor="#000000" LineWidth="0.3" ConstantWidth="false" MinLength="4.0" MinSpaceAbove="0.0" MinSpaceBelow="0.0"><PieChartLabel TextColor="#000000" TextHeight="6.0" TextStyle="" FontFamily="Arial" DecimalFormat="#0.0#####" LocaleLang="en" LocaleCountry="" LocaleVariant="" LineColor="#000000" LineWidth="0.3" Width="6.0" Height="6.0" InternalLines="true" NullLines="false" ShowTitle="false" CaptionType="NONE" CaptionLinkType="STRAIGHT_LINES" Id="12" Above="true" LineNo="0" LinePos="0.0"><LabelMargin Left="1.0" Top="1.0" Right="1.0" Bottom="1.0"></LabelMargin><DataIds TextColor="#000000" TextStyle="" FontFamily="Arial" DecimalFormat="#0.0#####" LocaleLang="en" LocaleCountry="" LocaleVariant=""><DataId PieColor="#0000FF" PieCaption="">12.0</DataId><DataId PieColor="#FF0000" PieCaption="">12.1</DataId></DataIds></PieChartLabel><InvisibleData Id="12.1" Text="0.999987" IsDecimal="true"></InvisibleData><InvisibleData Id="12.0" Text="1.3E-5" IsDecimal="true"></InvisibleData></Branch><Node Text="Oxyporus aokii AnisimFE19 21" IsDecimal="false" UniqueName="btvnzi4dfk" TextColor="#000000" TextHeight="6.0" TextStyle="" FontFamily="Arial" DecimalFormat="#0.0#####" LocaleLang="en" LocaleCountry="" LocaleVariant="" LineColor="#000000" LineWidth="0.3" EdgeRadius="1.0"><LeafMargin Left="1.0" Top="0.3" Right="1.0" Bottom="0.3"></LeafMargin><Branch Length="0.001037892" LineColor="#000000" LineWidth="0.3" ConstantWidth="false" MinLength="4.0" MinSpaceAbove="0.0" MinSpaceBelow="0.0"></Branch></Node><Node Text="Oxyporus aokii GornTaezhFE18 04" IsDecimal="false" UniqueName="zy9b4m441l" TextColor="#000000" TextHeight="6.0" TextStyle="" FontFamily="Arial" DecimalFormat="#0.0#####" LocaleLang="en" LocaleCountry="" LocaleVariant="" LineColor="#000000" LineWidth="0.3" EdgeRadius="1.0"><LeafMargin Left="1.0" Top="0.3" Right="1.0" Bottom="0.3"></LeafMargin><Branch Length="0.002503332" LineColor="#000000" LineWidth="0.3" ConstantWidth="false" MinLength="4.0" MinSpaceAbove="0.0" MinSpaceBelow="0.0"></Branch></Node></Node><Node Text="Oxyporus basiventris GornTaezhFE18 01" IsDecimal="false" UniqueName="uq7bdx14yh" TextColor="#000000" TextHeight="6.0" TextStyle="" FontFamily="Arial" DecimalFormat="#0.0#####" LocaleLang="en" LocaleCountry="" LocaleVariant="" LineColor="#000000" LineWidth="0.3" EdgeRadius="1.0"><LeafMargin Left="1.0" Top="0.3" Right="1.0" Bottom="0.3"></LeafMargin><Branch Length="0.002371015" LineColor="#000000" LineWidth="0.3" ConstantWidth="false" MinLength="4.0" MinSpaceAbove="0.0" MinSpaceBelow="0.0"></Branch></Node></Node><Node Text="internalNode32" IsDecimal="false" UniqueName="lu3kbpkp3u" TextColor="#000000" TextHeight="6.0" TextStyle="" FontFamily="Arial" DecimalFormat="#0.0#####" LocaleLang="en" LocaleCountry="" LocaleVariant="" LineColor="#000000" LineWidth="0.3" EdgeRadius="1.0"><LeafMargin Left="1.0" Top="0.3" Right="1.0" Bottom="0.3"></LeafMargin><Branch Length="0.007527675" LineColor="#000000" LineWidth="0.3" ConstantWidth="false" MinLength="4.0" MinSpaceAbove="0.0" MinSpaceBelow="0.0"><PieChartLabel TextColor="#000000" TextHeight="6.0" TextStyle="" FontFamily="Arial" DecimalFormat="#0.0#####" LocaleLang="en" LocaleCountry="" LocaleVariant="" LineColor="#000000" LineWidth="0.3" Width="6.0" Height="6.0" InternalLines="true" NullLines="false" ShowTitle="false" CaptionType="NONE" CaptionLinkType="STRAIGHT_LINES" Id="12" Above="true" LineNo="0" LinePos="0.0"><LabelMargin Left="1.0" Top="1.0" Right="1.0" Bottom="1.0"></LabelMargin><DataIds TextColor="#000000" TextStyle="" FontFamily="Arial" DecimalFormat="#0.0#####" LocaleLang="en" LocaleCountry="" LocaleVariant=""><DataId PieColor="#0000FF" PieCaption="">12.0</DataId><DataId PieColor="#FF0000" PieCaption="">12.1</DataId></DataIds></PieChartLabel><InvisibleData Id="12.1" Text="0.999916" IsDecimal="true"></InvisibleData><InvisibleData Id="12.0" Text="8.4E-5" IsDecimal="true"></InvisibleData></Branch><Node Text="Oxyporus basiventris Kunashir 19 173" IsDecimal="false" UniqueName="q8f0yteqys" TextColor="#000000" TextHeight="6.0" TextStyle="" FontFamily="Arial" DecimalFormat="#0.0#####" LocaleLang="en" LocaleCountry="" LocaleVariant="" LineColor="#000000" LineWidth="0.3" EdgeRadius="1.0"><LeafMargin Left="1.0" Top="0.3" Right="1.0" Bottom="0.3"></LeafMargin><Branch Length="0.002324215" LineColor="#000000" LineWidth="0.3" ConstantWidth="false" MinLength="4.0" MinSpaceAbove="0.0" MinSpaceBelow="0.0"></Branch></Node><Node Text="Oxyporus basiventris Kunashir 19 174" IsDecimal="false" UniqueName="e11mdw7nnf" TextColor="#000000" TextHeight="6.0" TextStyle="" FontFamily="Arial" DecimalFormat="#0.0#####" LocaleLang="en" LocaleCountry="" LocaleVariant="" LineColor="#000000" LineWidth="0.3" EdgeRadius="1.0"><LeafMargin Left="1.0" Top="0.3" Right="1.0" Bottom="0.3"></LeafMargin><Branch Length="0.007028374" LineColor="#000000" LineWidth="0.3" ConstantWidth="false" MinLength="4.0" MinSpaceAbove="0.0" MinSpaceBelow="0.0"></Branch></Node></Node><Node Text="internalNode33" IsDecimal="false" UniqueName="l56mjlntct" TextColor="#000000" TextHeight="6.0" TextStyle="" FontFamily="Arial" DecimalFormat="#0.0#####" LocaleLang="en" LocaleCountry="" LocaleVariant="" LineColor="#000000" LineWidth="0.3" EdgeRadius="1.0"><LeafMargin Left="1.0" Top="0.3" Right="1.0" Bottom="0.3"></LeafMargin><Branch Length="0.004151708" LineColor="#000000" LineWidth="0.3" ConstantWidth="false" MinLength="4.0" MinSpaceAbove="0.0" MinSpaceBelow="0.0"><PieChartLabel TextColor="#000000" TextHeight="6.0" TextStyle="" FontFamily="Arial" DecimalFormat="#0.0#####" LocaleLang="en" LocaleCountry="" LocaleVariant="" LineColor="#000000" LineWidth="0.3" Width="6.0" Height="6.0" InternalLines="true" NullLines="false" ShowTitle="false" CaptionType="NONE" CaptionLinkType="STRAIGHT_LINES" Id="12" Above="true" LineNo="0" LinePos="0.0"><LabelMargin Left="1.0" Top="1.0" Right="1.0" Bottom="1.0"></LabelMargin><DataIds TextColor="#000000" TextStyle="" FontFamily="Arial" DecimalFormat="#0.0#####" LocaleLang="en" LocaleCountry="" LocaleVariant=""><DataId PieColor="#0000FF" PieCaption="">12.0</DataId><DataId PieColor="#FF0000" PieCaption="">12.1</DataId></DataIds></PieChartLabel><InvisibleData Id="12.1" Text="0.999914" IsDecimal="true"></InvisibleData><InvisibleData Id="12.0" Text="8.6E-5" IsDecimal="true"></InvisibleData></Branch><Node Text="Oxyporus basiventris PogranFE19 20" IsDecimal="false" UniqueName="vj4txshf9v" TextColor="#000000" TextHeight="6.0" TextStyle="" FontFamily="Arial" DecimalFormat="#0.0#####" LocaleLang="en" LocaleCountry="" LocaleVariant="" LineColor="#000000" LineWidth="0.3" EdgeRadius="1.0"><LeafMargin Left="1.0" Top="0.3" Right="1.0" Bottom="0.3"></LeafMargin><Branch Length="0.003857879" LineColor="#000000" LineWidth="0.3" ConstantWidth="false" MinLength="4.0" MinSpaceAbove="0.0" MinSpaceBelow="0.0"></Branch></Node><Node Text="Oxyporus maxillosus Pogran19 02" IsDecimal="false" UniqueName="dk42xfbj6u" TextColor="#000000" TextHeight="6.0" TextStyle="" FontFamily="Arial" DecimalFormat="#0.0#####" LocaleLang="en" LocaleCountry="" LocaleVariant="" LineColor="#000000" LineWidth="0.3" EdgeRadius="1.0"><LeafMargin Left="1.0" Top="0.3" Right="1.0" Bottom="0.3"></LeafMargin><Branch Length="0.004361509" LineColor="#000000" LineWidth="0.3" ConstantWidth="false" MinLength="4.0" MinSpaceAbove="0.0" MinSpaceBelow="0.0"></Branch></Node></Node><Node Text="internalNode34" IsDecimal="false" UniqueName="cmilhzaq8b" TextColor="#000000" TextHeight="6.0" TextStyle="" FontFamily="Arial" DecimalFormat="#0.0#####" LocaleLang="en" LocaleCountry="" LocaleVariant="" LineColor="#000000" LineWidth="0.3" EdgeRadius="1.0"><LeafMargin Left="1.0" Top="0.3" Right="1.0" Bottom="0.3"></LeafMargin><Branch Length="0.00891202" LineColor="#000000" LineWidth="0.3" ConstantWidth="false" MinLength="4.0" MinSpaceAbove="0.0" MinSpaceBelow="0.0"><PieChartLabel TextColor="#000000" TextHeight="6.0" TextStyle="" FontFamily="Arial" DecimalFormat="#0.0#####" LocaleLang="en" LocaleCountry="" LocaleVariant="" LineColor="#000000" LineWidth="0.3" Width="6.0" Height="6.0" InternalLines="true" NullLines="false" ShowTitle="false" CaptionType="NONE" CaptionLinkType="STRAIGHT_LINES" Id="12" Above="true" LineNo="0" LinePos="0.0"><LabelMargin Left="1.0" Top="1.0" Right="1.0" Bottom="1.0"></LabelMargin><DataIds TextColor="#000000" TextStyle="" FontFamily="Arial" DecimalFormat="#0.0#####" LocaleLang="en" LocaleCountry="" LocaleVariant=""><DataId PieColor="#0000FF" PieCaption="">12.0</DataId><DataId PieColor="#FF0000" PieCaption="">12.1</DataId></DataIds></PieChartLabel><InvisibleData Id="12.1" Text="0.999828" IsDecimal="true"></InvisibleData><InvisibleData Id="12.0" Text="1.72E-4" IsDecimal="true"></InvisibleData></Branch><Node Text="Oxyporus japonicus Honshu 19 176" IsDecimal="false" UniqueName="3iuj7kbxrw" TextColor="#000000" TextHeight="6.0" TextStyle="" FontFamily="Arial" DecimalFormat="#0.0#####" LocaleLang="en" LocaleCountry="" LocaleVariant="" LineColor="#000000" LineWidth="0.3" EdgeRadius="1.0"><LeafMargin Left="1.0" Top="0.3" Right="1.0" Bottom="0.3"></LeafMargin><Branch Length="0.01085079" LineColor="#000000" LineWidth="0.3" ConstantWidth="false" MinLength="4.0" MinSpaceAbove="0.0" MinSpaceBelow="0.0"></Branch></Node><Node Text="Oxyporus maxillosus PrimKr 19 172" IsDecimal="false" UniqueName="3qzdfky0lt" TextColor="#000000" TextHeight="6.0" TextStyle="" FontFamily="Arial" DecimalFormat="#0.0#####" LocaleLang="en" LocaleCountry="" LocaleVariant="" LineColor="#000000" LineWidth="0.3" EdgeRadius="1.0"><LeafMargin Left="1.0" Top="0.3" Right="1.0" Bottom="0.3"></LeafMargin><Branch Length="0.003107555" LineColor="#000000" LineWidth="0.3" ConstantWidth="false" MinLength="4.0" MinSpaceAbove="0.0" MinSpaceBelow="0.0"></Branch></Node></Node><Node Text="Oxyporus japonicus1 CNUIC572" IsDecimal="false" UniqueName="hipfiws1r4" TextColor="#000000" TextHeight="6.0" TextStyle="" FontFamily="Arial" DecimalFormat="#0.0#####" LocaleLang="en" LocaleCountry="" LocaleVariant="" LineColor="#000000" LineWidth="0.3" EdgeRadius="1.0"><LeafMargin Left="1.0" Top="0.3" Right="1.0" Bottom="0.3"></LeafMargin><Branch Length="0.00170398" LineColor="#000000" LineWidth="0.3" ConstantWidth="false" MinLength="4.0" MinSpaceAbove="0.0" MinSpaceBelow="0.0"></Branch></Node><Node Text="internalNode35" IsDecimal="false" UniqueName="vh0ceifjkn" TextColor="#000000" TextHeight="6.0" TextStyle="" FontFamily="Arial" DecimalFormat="#0.0#####" LocaleLang="en" LocaleCountry="" LocaleVariant="" LineColor="#000000" LineWidth="0.3" EdgeRadius="1.0"><LeafMargin Left="1.0" Top="0.3" Right="1.0" Bottom="0.3"></LeafMargin><Branch Length="0.002115912" LineColor="#000000" LineWidth="0.3" ConstantWidth="false" MinLength="4.0" MinSpaceAbove="0.0" MinSpaceBelow="0.0"><PieChartLabel TextColor="#000000" TextHeight="6.0" TextStyle="" FontFamily="Arial" DecimalFormat="#0.0#####" LocaleLang="en" LocaleCountry="" LocaleVariant="" LineColor="#000000" LineWidth="0.3" Width="6.0" Height="6.0" InternalLines="true" NullLines="false" ShowTitle="false" CaptionType="NONE" CaptionLinkType="STRAIGHT_LINES" Id="12" Above="true" LineNo="0" LinePos="0.0"><LabelMargin Left="1.0" Top="1.0" Right="1.0" Bottom="1.0"></LabelMargin><DataIds TextColor="#000000" TextStyle="" FontFamily="Arial" DecimalFormat="#0.0#####" LocaleLang="en" LocaleCountry="" LocaleVariant=""><DataId PieColor="#0000FF" PieCaption="">12.0</DataId><DataId PieColor="#FF0000" PieCaption="">12.1</DataId></DataIds></PieChartLabel><InvisibleData Id="12.1" Text="0.999985" IsDecimal="true"></InvisibleData><InvisibleData Id="12.0" Text="1.5E-5" IsDecimal="true"></InvisibleData></Branch><Node Text="Oxyporus japonicus10 CNUIC635" IsDecimal="false" UniqueName="3p8djrn8m0" TextColor="#000000" TextHeight="6.0" TextStyle="" FontFamily="Arial" DecimalFormat="#0.0#####" LocaleLang="en" LocaleCountry="" LocaleVariant="" LineColor="#000000" LineWidth="0.3" EdgeRadius="1.0"><LeafMargin Left="1.0" Top="0.3" Right="1.0" Bottom="0.3"></LeafMargin><Branch Length="0.0011405" LineColor="#000000" LineWidth="0.3" ConstantWidth="false" MinLength="4.0" MinSpaceAbove="0.0" MinSpaceBelow="0.0"></Branch></Node><Node Text="Oxyporus japonicus5 CNUIC518" IsDecimal="false" UniqueName="ajepu0rwpg" TextColor="#000000" TextHeight="6.0" TextStyle="" FontFamily="Arial" DecimalFormat="#0.0#####" LocaleLang="en" LocaleCountry="" LocaleVariant="" LineColor="#000000" LineWidth="0.3" EdgeRadius="1.0"><LeafMargin Left="1.0" Top="0.3" Right="1.0" Bottom="0.3"></LeafMargin><Branch Length="0.002557182" LineColor="#000000" LineWidth="0.3" ConstantWidth="false" MinLength="4.0" MinSpaceAbove="0.0" MinSpaceBelow="0.0"></Branch></Node></Node><Node Text="Oxyporus japonicus2 CNUIC610" IsDecimal="false" UniqueName="jnetwf9x1m" TextColor="#000000" TextHeight="6.0" TextStyle="" FontFamily="Arial" DecimalFormat="#0.0#####" LocaleLang="en" LocaleCountry="" LocaleVariant="" LineColor="#000000" LineWidth="0.3" EdgeRadius="1.0"><LeafMargin Left="1.0" Top="0.3" Right="1.0" Bottom="0.3"></LeafMargin><Branch Length="0.002462125" LineColor="#000000" LineWidth="0.3" ConstantWidth="false" MinLength="4.0" MinSpaceAbove="0.0" MinSpaceBelow="0.0"></Branch></Node><Node Text="internalNode36" IsDecimal="false" UniqueName="9jdr30fuag" TextColor="#000000" TextHeight="6.0" TextStyle="" FontFamily="Arial" DecimalFormat="#0.0#####" LocaleLang="en" LocaleCountry="" LocaleVariant="" LineColor="#000000" LineWidth="0.3" EdgeRadius="1.0"><LeafMargin Left="1.0" Top="0.3" Right="1.0" Bottom="0.3"></LeafMargin><Branch Length="0.002507072" LineColor="#000000" LineWidth="0.3" ConstantWidth="false" MinLength="4.0" MinSpaceAbove="0.0" MinSpaceBelow="0.0"><PieChartLabel TextColor="#000000" TextHeight="6.0" TextStyle="" FontFamily="Arial" DecimalFormat="#0.0#####" LocaleLang="en" LocaleCountry="" LocaleVariant="" LineColor="#000000" LineWidth="0.3" Width="6.0" Height="6.0" InternalLines="true" NullLines="false" ShowTitle="false" CaptionType="NONE" CaptionLinkType="STRAIGHT_LINES" Id="12" Above="true" LineNo="0" LinePos="0.0"><LabelMargin Left="1.0" Top="1.0" Right="1.0" Bottom="1.0"></LabelMargin><DataIds TextColor="#000000" TextStyle="" FontFamily="Arial" DecimalFormat="#0.0#####" LocaleLang="en" LocaleCountry="" LocaleVariant=""><DataId PieColor="#0000FF" PieCaption="">12.0</DataId><DataId PieColor="#FF0000" PieCaption="">12.1</DataId></DataIds></PieChartLabel><InvisibleData Id="12.1" Text="0.999979" IsDecimal="true"></InvisibleData><InvisibleData Id="12.0" Text="2.1E-5" IsDecimal="true"></InvisibleData></Branch><Node Text="Oxyporus japonicus4 CNUIC612" IsDecimal="false" UniqueName="p8rrr354d9" TextColor="#000000" TextHeight="6.0" TextStyle="" FontFamily="Arial" DecimalFormat="#0.0#####" LocaleLang="en" LocaleCountry="" LocaleVariant="" LineColor="#000000" LineWidth="0.3" EdgeRadius="1.0"><LeafMargin Left="1.0" Top="0.3" Right="1.0" Bottom="0.3"></LeafMargin><Branch Length="0.003949345" LineColor="#000000" LineWidth="0.3" ConstantWidth="false" MinLength="4.0" MinSpaceAbove="0.0" MinSpaceBelow="0.0"></Branch></Node><Node Text="Oxyporus japonicus6 CNUIC607" IsDecimal="false" UniqueName="66aicweemp" TextColor="#000000" TextHeight="6.0" TextStyle="" FontFamily="Arial" DecimalFormat="#0.0#####" LocaleLang="en" LocaleCountry="" LocaleVariant="" LineColor="#000000" LineWidth="0.3" EdgeRadius="1.0"><LeafMargin Left="1.0" Top="0.3" Right="1.0" Bottom="0.3"></LeafMargin><Branch Length="0.001043314" LineColor="#000000" LineWidth="0.3" ConstantWidth="false" MinLength="4.0" MinSpaceAbove="0.0" MinSpaceBelow="0.0"></Branch></Node></Node><Node Text="Oxyporus japonicus8 CNUIC609" IsDecimal="false" UniqueName="v2ug850pui" TextColor="#000000" TextHeight="6.0" TextStyle="" FontFamily="Arial" DecimalFormat="#0.0#####" LocaleLang="en" LocaleCountry="" LocaleVariant="" LineColor="#000000" LineWidth="0.3" EdgeRadius="1.0"><LeafMargin Left="1.0" Top="0.3" Right="1.0" Bottom="0.3"></LeafMargin><Branch Length="0.007091306" LineColor="#000000" LineWidth="0.3" ConstantWidth="false" MinLength="4.0" MinSpaceAbove="0.0" MinSpaceBelow="0.0"></Branch></Node><Node Text="internalNode37" IsDecimal="false" UniqueName="bnu8kyn3pf" TextColor="#000000" TextHeight="6.0" TextStyle="" FontFamily="Arial" DecimalFormat="#0.0#####" LocaleLang="en" LocaleCountry="" LocaleVariant="" LineColor="#000000" LineWidth="0.3" EdgeRadius="1.0"><LeafMargin Left="1.0" Top="0.3" Right="1.0" Bottom="0.3"></LeafMargin><Branch Length="0.003804276" LineColor="#000000" LineWidth="0.3" ConstantWidth="false" MinLength="4.0" MinSpaceAbove="0.0" MinSpaceBelow="0.0"><PieChartLabel TextColor="#000000" TextHeight="6.0" TextStyle="" FontFamily="Arial" DecimalFormat="#0.0#####" LocaleLang="en" LocaleCountry="" LocaleVariant="" LineColor="#000000" LineWidth="0.3" Width="6.0" Height="6.0" InternalLines="true" NullLines="false" ShowTitle="false" CaptionType="NONE" CaptionLinkType="STRAIGHT_LINES" Id="12" Above="true" LineNo="0" LinePos="0.0"><LabelMargin Left="1.0" Top="1.0" Right="1.0" Bottom="1.0"></LabelMargin><DataIds TextColor="#000000" TextStyle="" FontFamily="Arial" DecimalFormat="#0.0#####" LocaleLang="en" LocaleCountry="" LocaleVariant=""><DataId PieColor="#0000FF" PieCaption="">12.0</DataId><DataId PieColor="#FF0000" PieCaption="">12.1</DataId></DataIds></PieChartLabel><InvisibleData Id="12.1" Text="1.0" IsDecimal="true"></InvisibleData><InvisibleData Id="12.0" Text="0.0" IsDecimal="true"></InvisibleData></Branch><Node Text="Oxyporus maxillosus Altay19 14" IsDecimal="false" UniqueName="0yu9ozs6uq" TextColor="#000000" TextHeight="6.0" TextStyle="" FontFamily="Arial" DecimalFormat="#0.0#####" LocaleLang="en" LocaleCountry="" LocaleVariant="" LineColor="#000000" LineWidth="0.3" EdgeRadius="1.0"><LeafMargin Left="1.0" Top="0.3" Right="1.0" Bottom="0.3"></LeafMargin><Branch Length="0.001031708" LineColor="#000000" LineWidth="0.3" ConstantWidth="false" MinLength="4.0" MinSpaceAbove="0.0" MinSpaceBelow="0.0"></Branch></Node><Node Text="Oxyporus maxillosus Altay19 50b 15" IsDecimal="false" UniqueName="zz11s0b53g" TextColor="#000000" TextHeight="6.0" TextStyle="" FontFamily="Arial" DecimalFormat="#0.0#####" LocaleLang="en" LocaleCountry="" LocaleVariant="" LineColor="#000000" LineWidth="0.3" EdgeRadius="1.0"><LeafMargin Left="1.0" Top="0.3" Right="1.0" Bottom="0.3"></LeafMargin><Branch Length="0.002400905" LineColor="#000000" LineWidth="0.3" ConstantWidth="false" MinLength="4.0" MinSpaceAbove="0.0" MinSpaceBelow="0.0"></Branch></Node><Node Text="Oxyporus maxillosus Buryatia19 12" IsDecimal="false" UniqueName="hyrua6rgg5" TextColor="#000000" TextHeight="6.0" TextStyle="" FontFamily="Arial" DecimalFormat="#0.0#####" LocaleLang="en" LocaleCountry="" LocaleVariant="" LineColor="#000000" LineWidth="0.3" EdgeRadius="1.0"><LeafMargin Left="1.0" Top="0.3" Right="1.0" Bottom="0.3"></LeafMargin><Branch Length="0.00101337" LineColor="#000000" LineWidth="0.3" ConstantWidth="false" MinLength="4.0" MinSpaceAbove="0.0" MinSpaceBelow="0.0"></Branch></Node><Node Text="Oxyporus maxillosus Ch Mans 05" IsDecimal="false" UniqueName="0u9yocmhm6" TextColor="#000000" TextHeight="6.0" TextStyle="" FontFamily="Arial" DecimalFormat="#0.0#####" LocaleLang="en" LocaleCountry="" LocaleVariant="" LineColor="#000000" LineWidth="0.3" EdgeRadius="1.0"><LeafMargin Left="1.0" Top="0.3" Right="1.0" Bottom="0.3"></LeafMargin><Branch Length="0.001028518" LineColor="#000000" LineWidth="0.3" ConstantWidth="false" MinLength="4.0" MinSpaceAbove="0.0" MinSpaceBelow="0.0"></Branch></Node><Node Text="Oxyporus maxillosus Ch Mans 22" IsDecimal="false" UniqueName="63w87l9pfm" TextColor="#000000" TextHeight="6.0" TextStyle="" FontFamily="Arial" DecimalFormat="#0.0#####" LocaleLang="en" LocaleCountry="" LocaleVariant="" LineColor="#000000" LineWidth="0.3" EdgeRadius="1.0"><LeafMargin Left="1.0" Top="0.3" Right="1.0" Bottom="0.3"></LeafMargin><Branch Length="0.00207992" LineColor="#000000" LineWidth="0.3" ConstantWidth="false" MinLength="4.0" MinSpaceAbove="0.0" MinSpaceBelow="0.0"></Branch></Node><Node Text="Oxyporus maxillosus Czech16 23" IsDecimal="false" UniqueName="ilf0kez1f8" TextColor="#000000" TextHeight="6.0" TextStyle="" FontFamily="Arial" DecimalFormat="#0.0#####" LocaleLang="en" LocaleCountry="" LocaleVariant="" LineColor="#000000" LineWidth="0.3" EdgeRadius="1.0"><LeafMargin Left="1.0" Top="0.3" Right="1.0" Bottom="0.3"></LeafMargin><Branch Length="0.003750069" LineColor="#000000" LineWidth="0.3" ConstantWidth="false" MinLength="4.0" MinSpaceAbove="0.0" MinSpaceBelow="0.0"></Branch></Node><Node Text="Oxyporus maxillosus Irkutsk95 19 175" IsDecimal="false" UniqueName="x7gdd5l2x2" TextColor="#000000" TextHeight="6.0" TextStyle="" FontFamily="Arial" DecimalFormat="#0.0#####" LocaleLang="en" LocaleCountry="" LocaleVariant="" LineColor="#000000" LineWidth="0.3" EdgeRadius="1.0"><LeafMargin Left="1.0" Top="0.3" Right="1.0" Bottom="0.3"></LeafMargin><Branch Length="0.001882188" LineColor="#000000" LineWidth="0.3" ConstantWidth="false" MinLength="4.0" MinSpaceAbove="0.0" MinSpaceBelow="0.0"></Branch></Node><Node Text="Oxyporus maxillosus Sverdl19 24" IsDecimal="false" UniqueName="7t494jlrl8" TextColor="#000000" TextHeight="6.0" TextStyle="" FontFamily="Arial" DecimalFormat="#0.0#####" LocaleLang="en" LocaleCountry="" LocaleVariant="" LineColor="#000000" LineWidth="0.3" EdgeRadius="1.0"><LeafMargin Left="1.0" Top="0.3" Right="1.0" Bottom="0.3"></LeafMargin><Branch Length="0.001031678" LineColor="#000000" LineWidth="0.3" ConstantWidth="false" MinLength="4.0" MinSpaceAbove="0.0" MinSpaceBelow="0.0"></Branch></Node></Node><Node Text="Oxyporus maxillosus AnisimFE19 28" IsDecimal="false" UniqueName="5hunair3uu" TextColor="#000000" TextHeight="6.0" TextStyle="" FontFamily="Arial" DecimalFormat="#0.0#####" LocaleLang="en" LocaleCountry="" LocaleVariant="" LineColor="#000000" LineWidth="0.3" EdgeRadius="1.0"><LeafMargin Left="1.0" Top="0.3" Right="1.0" Bottom="0.3"></LeafMargin><Branch Length="0.001041284" LineColor="#000000" LineWidth="0.3" ConstantWidth="false" MinLength="4.0" MinSpaceAbove="0.0" MinSpaceBelow="0.0"></Branch></Node><Node Text="Oxyporus maxillosus GornTaezhFE18" IsDecimal="false" UniqueName="dlqh5kneqo" TextColor="#000000" TextHeight="6.0" TextStyle="" FontFamily="Arial" DecimalFormat="#0.0#####" LocaleLang="en" LocaleCountry="" LocaleVariant="" LineColor="#000000" LineWidth="0.3" EdgeRadius="1.0"><LeafMargin Left="1.0" Top="0.3" Right="1.0" Bottom="0.3"></LeafMargin><Branch Length="0.001059361" LineColor="#000000" LineWidth="0.3" ConstantWidth="false" MinLength="4.0" MinSpaceAbove="0.0" MinSpaceBelow="0.0"></Branch></Node><Node Text="Oxyporus maxillosus GornTaezhFE18 03" IsDecimal="false" UniqueName="uspayyz70z" TextColor="#000000" TextHeight="6.0" TextStyle="" FontFamily="Arial" DecimalFormat="#0.0#####" LocaleLang="en" LocaleCountry="" LocaleVariant="" LineColor="#000000" LineWidth="0.3" EdgeRadius="1.0"><LeafMargin Left="1.0" Top="0.3" Right="1.0" Bottom="0.3"></LeafMargin><Branch Length="0.002364423" LineColor="#000000" LineWidth="0.3" ConstantWidth="false" MinLength="4.0" MinSpaceAbove="0.0" MinSpaceBelow="0.0"></Branch></Node><Node Text="Oxyporus maxillosus GornTaezhFE18 37" IsDecimal="false" UniqueName="so6kr3ltnb" TextColor="#000000" TextHeight="6.0" TextStyle="" FontFamily="Arial" DecimalFormat="#0.0#####" LocaleLang="en" LocaleCountry="" LocaleVariant="" LineColor="#000000" LineWidth="0.3" EdgeRadius="1.0"><LeafMargin Left="1.0" Top="0.3" Right="1.0" Bottom="0.3"></LeafMargin><Branch Length="9.97839E-4" LineColor="#000000" LineWidth="0.3" ConstantWidth="false" MinLength="4.0" MinSpaceAbove="0.0" MinSpaceBelow="0.0"></Branch></Node><Node Text="Oxyporus maxillosus larvaGornTaezhFE18" IsDecimal="false" UniqueName="0d4q4iyen0" TextColor="#000000" TextHeight="6.0" TextStyle="" FontFamily="Arial" DecimalFormat="#0.0#####" LocaleLang="en" LocaleCountry="" LocaleVariant="" LineColor="#000000" LineWidth="0.3" EdgeRadius="1.0"><LeafMargin Left="1.0" Top="0.3" Right="1.0" Bottom="0.3"></LeafMargin><Branch Length="0.001009975" LineColor="#000000" LineWidth="0.3" ConstantWidth="false" MinLength="4.0" MinSpaceAbove="0.0" MinSpaceBelow="0.0"></Branch></Node></Node><Node Text="Oxyporus japonicus3 CNUIC611" IsDecimal="false" UniqueName="kdasiqo71h" TextColor="#000000" TextHeight="6.0" TextStyle="" FontFamily="Arial" DecimalFormat="#0.0#####" LocaleLang="en" LocaleCountry="" LocaleVariant="" LineColor="#000000" LineWidth="0.3" EdgeRadius="1.0"><LeafMargin Left="1.0" Top="0.3" Right="1.0" Bottom="0.3"></LeafMargin><Branch Length="0.003965777" LineColor="#000000" LineWidth="0.3" ConstantWidth="false" MinLength="4.0" MinSpaceAbove="0.0" MinSpaceBelow="0.0"></Branch></Node><Node Text="Oxyporus japonicus7 CNUIC608" IsDecimal="false" UniqueName="3qaixmzpew" TextColor="#000000" TextHeight="6.0" TextStyle="" FontFamily="Arial" DecimalFormat="#0.0#####" LocaleLang="en" LocaleCountry="" LocaleVariant="" LineColor="#000000" LineWidth="0.3" EdgeRadius="1.0"><LeafMargin Left="1.0" Top="0.3" Right="1.0" Bottom="0.3"></LeafMargin><Branch Length="0.002555539" LineColor="#000000" LineWidth="0.3" ConstantWidth="false" MinLength="4.0" MinSpaceAbove="0.0" MinSpaceBelow="0.0"></Branch></Node><Node Text="Oxyporus japonicus9 CNUIC631" IsDecimal="false" UniqueName="ht1z6wuggr" TextColor="#000000" TextHeight="6.0" TextStyle="" FontFamily="Arial" DecimalFormat="#0.0#####" LocaleLang="en" LocaleCountry="" LocaleVariant="" LineColor="#000000" LineWidth="0.3" EdgeRadius="1.0"><LeafMargin Left="1.0" Top="0.3" Right="1.0" Bottom="0.3"></LeafMargin><Branch Length="9.993379E-4" LineColor="#000000" LineWidth="0.3" ConstantWidth="false" MinLength="4.0" MinSpaceAbove="0.0" MinSpaceBelow="0.0"></Branch></Node></Node><Node Text="internalNode38" IsDecimal="false" UniqueName="ybm8142hjq" TextColor="#000000" TextHeight="6.0" TextStyle="" FontFamily="Arial" DecimalFormat="#0.0#####" LocaleLang="en" LocaleCountry="" LocaleVariant="" LineColor="#000000" LineWidth="0.3" EdgeRadius="1.0"><LeafMargin Left="1.0" Top="0.3" Right="1.0" Bottom="0.3"></LeafMargin><Branch Length="0.0278175" LineColor="#000000" LineWidth="0.3" ConstantWidth="false" MinLength="4.0" MinSpaceAbove="0.0" MinSpaceBelow="0.0"><PieChartLabel TextColor="#000000" TextHeight="6.0" TextStyle="" FontFamily="Arial" DecimalFormat="#0.0#####" LocaleLang="en" LocaleCountry="" LocaleVariant="" LineColor="#000000" LineWidth="0.3" Width="6.0" Height="6.0" InternalLines="true" NullLines="false" ShowTitle="false" CaptionType="NONE" CaptionLinkType="STRAIGHT_LINES" Id="12" Above="true" LineNo="0" LinePos="0.0"><LabelMargin Left="1.0" Top="1.0" Right="1.0" Bottom="1.0"></LabelMargin><DataIds TextColor="#000000" TextStyle="" FontFamily="Arial" DecimalFormat="#0.0#####" LocaleLang="en" LocaleCountry="" LocaleVariant=""><DataId PieColor="#0000FF" PieCaption="">12.0</DataId><DataId PieColor="#FF0000" PieCaption="">12.1</DataId></DataIds></PieChartLabel><InvisibleData Id="12.1" Text="0.999999" IsDecimal="true"></InvisibleData><InvisibleData Id="12.0" Text="1.0E-6" IsDecimal="true"></InvisibleData></Branch><Node Text="Oxyporus niger AnisimFE19 27" IsDecimal="false" UniqueName="wt1cxf3nir" TextColor="#000000" TextHeight="6.0" TextStyle="" FontFamily="Arial" DecimalFormat="#0.0#####" LocaleLang="en" LocaleCountry="" LocaleVariant="" LineColor="#000000" LineWidth="0.3" EdgeRadius="1.0"><LeafMargin Left="1.0" Top="0.3" Right="1.0" Bottom="0.3"></LeafMargin><Branch Length="0.003877145" LineColor="#000000" LineWidth="0.3" ConstantWidth="false" MinLength="4.0" MinSpaceAbove="0.0" MinSpaceBelow="0.0"></Branch></Node><Node Text="internalNode39" IsDecimal="false" UniqueName="8ue77oj3eg" TextColor="#000000" TextHeight="6.0" TextStyle="" FontFamily="Arial" DecimalFormat="#0.0#####" LocaleLang="en" LocaleCountry="" LocaleVariant="" LineColor="#000000" LineWidth="0.3" EdgeRadius="1.0"><LeafMargin Left="1.0" Top="0.3" Right="1.0" Bottom="0.3"></LeafMargin><Branch Length="0.006298653" LineColor="#000000" LineWidth="0.3" ConstantWidth="false" MinLength="4.0" MinSpaceAbove="0.0" MinSpaceBelow="0.0"><PieChartLabel TextColor="#000000" TextHeight="6.0" TextStyle="" FontFamily="Arial" DecimalFormat="#0.0#####" LocaleLang="en" LocaleCountry="" LocaleVariant="" LineColor="#000000" LineWidth="0.3" Width="6.0" Height="6.0" InternalLines="true" NullLines="false" ShowTitle="false" CaptionType="NONE" CaptionLinkType="STRAIGHT_LINES" Id="12" Above="true" LineNo="0" LinePos="0.0"><LabelMargin Left="1.0" Top="1.0" Right="1.0" Bottom="1.0"></LabelMargin><DataIds TextColor="#000000" TextStyle="" FontFamily="Arial" DecimalFormat="#0.0#####" LocaleLang="en" LocaleCountry="" LocaleVariant=""><DataId PieColor="#0000FF" PieCaption="">12.0</DataId><DataId PieColor="#FF0000" PieCaption="">12.1</DataId></DataIds></PieChartLabel><InvisibleData Id="12.1" Text="0.99993" IsDecimal="true"></InvisibleData><InvisibleData Id="12.0" Text="7.0E-5" IsDecimal="true"></InvisibleData></Branch><Node Text="Oxyporus niger GornTaezhFE18 29" IsDecimal="false" UniqueName="3y7b8u38hj" TextColor="#000000" TextHeight="6.0" TextStyle="" FontFamily="Arial" DecimalFormat="#0.0#####" LocaleLang="en" LocaleCountry="" LocaleVariant="" LineColor="#000000" LineWidth="0.3" EdgeRadius="1.0"><LeafMargin Left="1.0" Top="0.3" Right="1.0" Bottom="0.3"></LeafMargin><Branch Length="0.002550665" LineColor="#000000" LineWidth="0.3" ConstantWidth="false" MinLength="4.0" MinSpaceAbove="0.0" MinSpaceBelow="0.0"></Branch></Node><Node Text="Oxyporus niger ListvFE19 31" IsDecimal="false" UniqueName="kqbw0edmqg" TextColor="#000000" TextHeight="6.0" TextStyle="" FontFamily="Arial" DecimalFormat="#0.0#####" LocaleLang="en" LocaleCountry="" LocaleVariant="" LineColor="#000000" LineWidth="0.3" EdgeRadius="1.0"><LeafMargin Left="1.0" Top="0.3" Right="1.0" Bottom="0.3"></LeafMargin><Branch Length="0.005380707" LineColor="#000000" LineWidth="0.3" ConstantWidth="false" MinLength="4.0" MinSpaceAbove="0.0" MinSpaceBelow="0.0"></Branch></Node></Node><Node Text="internalNode40" IsDecimal="false" UniqueName="0y6w07klf9" TextColor="#000000" TextHeight="6.0" TextStyle="" FontFamily="Arial" DecimalFormat="#0.0#####" LocaleLang="en" LocaleCountry="" LocaleVariant="" LineColor="#000000" LineWidth="0.3" EdgeRadius="1.0"><LeafMargin Left="1.0" Top="0.3" Right="1.0" Bottom="0.3"></LeafMargin><Branch Length="0.002559094" LineColor="#000000" LineWidth="0.3" ConstantWidth="false" MinLength="4.0" MinSpaceAbove="0.0" MinSpaceBelow="0.0"><PieChartLabel TextColor="#000000" TextHeight="6.0" TextStyle="" FontFamily="Arial" DecimalFormat="#0.0#####" LocaleLang="en" LocaleCountry="" LocaleVariant="" LineColor="#000000" LineWidth="0.3" Width="6.0" Height="6.0" InternalLines="true" NullLines="false" ShowTitle="false" CaptionType="NONE" CaptionLinkType="STRAIGHT_LINES" Id="12" Above="true" LineNo="0" LinePos="0.0"><LabelMargin Left="1.0" Top="1.0" Right="1.0" Bottom="1.0"></LabelMargin><DataIds TextColor="#000000" TextStyle="" FontFamily="Arial" DecimalFormat="#0.0#####" LocaleLang="en" LocaleCountry="" LocaleVariant=""><DataId PieColor="#0000FF" PieCaption="">12.0</DataId><DataId PieColor="#FF0000" PieCaption="">12.1</DataId></DataIds></PieChartLabel><InvisibleData Id="12.1" Text="0.999669" IsDecimal="true"></InvisibleData><InvisibleData Id="12.0" Text="3.31E-4" IsDecimal="true"></InvisibleData></Branch><Node Text="Oxyporus niger1 CNUIC 0576" IsDecimal="false" UniqueName="hommvbh4oi" TextColor="#000000" TextHeight="6.0" TextStyle="" FontFamily="Arial" DecimalFormat="#0.0#####" LocaleLang="en" LocaleCountry="" LocaleVariant="" LineColor="#000000" LineWidth="0.3" EdgeRadius="1.0"><LeafMargin Left="1.0" Top="0.3" Right="1.0" Bottom="0.3"></LeafMargin><Branch Length="0.005535998" LineColor="#000000" LineWidth="0.3" ConstantWidth="false" MinLength="4.0" MinSpaceAbove="0.0" MinSpaceBelow="0.0"></Branch></Node><Node Text="internalNode41" IsDecimal="false" UniqueName="e6mwrinrf7" TextColor="#000000" TextHeight="6.0" TextStyle="" FontFamily="Arial" DecimalFormat="#0.0#####" LocaleLang="en" LocaleCountry="" LocaleVariant="" LineColor="#000000" LineWidth="0.3" EdgeRadius="1.0"><LeafMargin Left="1.0" Top="0.3" Right="1.0" Bottom="0.3"></LeafMargin><Branch Length="0.01177475" LineColor="#000000" LineWidth="0.3" ConstantWidth="false" MinLength="4.0" MinSpaceAbove="0.0" MinSpaceBelow="0.0"><PieChartLabel TextColor="#000000" TextHeight="6.0" TextStyle="" FontFamily="Arial" DecimalFormat="#0.0#####" LocaleLang="en" LocaleCountry="" LocaleVariant="" LineColor="#000000" LineWidth="0.3" Width="6.0" Height="6.0" InternalLines="true" NullLines="false" ShowTitle="false" CaptionType="NONE" CaptionLinkType="STRAIGHT_LINES" Id="12" Above="true" LineNo="0" LinePos="0.0"><LabelMargin Left="1.0" Top="1.0" Right="1.0" Bottom="1.0"></LabelMargin><DataIds TextColor="#000000" TextStyle="" FontFamily="Arial" DecimalFormat="#0.0#####" LocaleLang="en" LocaleCountry="" LocaleVariant=""><DataId PieColor="#0000FF" PieCaption="">12.0</DataId><DataId PieColor="#FF0000" PieCaption="">12.1</DataId></DataIds></PieChartLabel><InvisibleData Id="12.1" Text="0.999995" IsDecimal="true"></InvisibleData><InvisibleData Id="12.0" Text="5.0E-6" IsDecimal="true"></InvisibleData></Branch><Node Text="Oxyporus niger5 CNUIC 0580" IsDecimal="false" UniqueName="feet8sat1k" TextColor="#000000" TextHeight="6.0" TextStyle="" FontFamily="Arial" DecimalFormat="#0.0#####" LocaleLang="en" LocaleCountry="" LocaleVariant="" LineColor="#000000" LineWidth="0.3" EdgeRadius="1.0"><LeafMargin Left="1.0" Top="0.3" Right="1.0" Bottom="0.3"></LeafMargin><Branch Length="9.954876E-4" LineColor="#000000" LineWidth="0.3" ConstantWidth="false" MinLength="4.0" MinSpaceAbove="0.0" MinSpaceBelow="0.0"></Branch></Node><Node Text="Oxyporus niger6 CNUIC 0581" IsDecimal="false" UniqueName="05n2ut32s8" TextColor="#000000" TextHeight="6.0" TextStyle="" FontFamily="Arial" DecimalFormat="#0.0#####" LocaleLang="en" LocaleCountry="" LocaleVariant="" LineColor="#000000" LineWidth="0.3" EdgeRadius="1.0"><LeafMargin Left="1.0" Top="0.3" Right="1.0" Bottom="0.3"></LeafMargin><Branch Length="9.993335E-4" LineColor="#000000" LineWidth="0.3" ConstantWidth="false" MinLength="4.0" MinSpaceAbove="0.0" MinSpaceBelow="0.0"></Branch></Node></Node></Node></Node></Node><Node Text="internalNode42" IsDecimal="false" UniqueName="46otflr5oj" TextColor="#000000" TextHeight="6.0" TextStyle="" FontFamily="Arial" DecimalFormat="#0.0#####" LocaleLang="en" LocaleCountry="" LocaleVariant="" LineColor="#000000" LineWidth="0.3" EdgeRadius="1.0"><LeafMargin Left="1.0" Top="0.3" Right="1.0" Bottom="0.3"></LeafMargin><Branch Length="0.05090168" LineColor="#000000" LineWidth="0.3" ConstantWidth="false" MinLength="4.0" MinSpaceAbove="0.0" MinSpaceBelow="0.0"><PieChartLabel TextColor="#000000" TextHeight="6.0" TextStyle="" FontFamily="Arial" DecimalFormat="#0.0#####" LocaleLang="en" LocaleCountry="" LocaleVariant="" LineColor="#000000" LineWidth="0.3" Width="6.0" Height="6.0" InternalLines="true" NullLines="false" ShowTitle="false" CaptionType="NONE" CaptionLinkType="STRAIGHT_LINES" Id="12" Above="true" LineNo="0" LinePos="0.0"><LabelMargin Left="1.0" Top="1.0" Right="1.0" Bottom="1.0"></LabelMargin><DataIds TextColor="#000000" TextStyle="" FontFamily="Arial" DecimalFormat="#0.0#####" LocaleLang="en" LocaleCountry="" LocaleVariant=""><DataId PieColor="#0000FF" PieCaption="">12.0</DataId><DataId PieColor="#FF0000" PieCaption="">12.1</DataId></DataIds></PieChartLabel><InvisibleData Id="12.1" Text="0.999883" IsDecimal="true"></InvisibleData><InvisibleData Id="12.0" Text="1.17E-4" IsDecimal="true"></InvisibleData></Branch><Node Text="Oxyporus procerus CNUIC590" IsDecimal="false" UniqueName="3xxj3h46ez" TextColor="#000000" TextHeight="6.0" TextStyle="" FontFamily="Arial" DecimalFormat="#0.0#####" LocaleLang="en" LocaleCountry="" LocaleVariant="" LineColor="#000000" LineWidth="0.3" EdgeRadius="1.0"><LeafMargin Left="1.0" Top="0.3" Right="1.0" Bottom="0.3"></LeafMargin><Branch Length="0.005374603" LineColor="#000000" LineWidth="0.3" ConstantWidth="false" MinLength="4.0" MinSpaceAbove="0.0" MinSpaceBelow="0.0"></Branch></Node><Node Text="internalNode43" IsDecimal="false" UniqueName="iw00apfcqp" TextColor="#000000" TextHeight="6.0" TextStyle="" FontFamily="Arial" DecimalFormat="#0.0#####" LocaleLang="en" LocaleCountry="" LocaleVariant="" LineColor="#000000" LineWidth="0.3" EdgeRadius="1.0"><LeafMargin Left="1.0" Top="0.3" Right="1.0" Bottom="0.3"></LeafMargin><Branch Length="0.00423988" LineColor="#000000" LineWidth="0.3" ConstantWidth="false" MinLength="4.0" MinSpaceAbove="0.0" MinSpaceBelow="0.0"><PieChartLabel TextColor="#000000" TextHeight="6.0" TextStyle="" FontFamily="Arial" DecimalFormat="#0.0#####" LocaleLang="en" LocaleCountry="" LocaleVariant="" LineColor="#000000" LineWidth="0.3" Width="6.0" Height="6.0" InternalLines="true" NullLines="false" ShowTitle="false" CaptionType="NONE" CaptionLinkType="STRAIGHT_LINES" Id="12" Above="true" LineNo="0" LinePos="0.0"><LabelMargin Left="1.0" Top="1.0" Right="1.0" Bottom="1.0"></LabelMargin><DataIds TextColor="#000000" TextStyle="" FontFamily="Arial" DecimalFormat="#0.0#####" LocaleLang="en" LocaleCountry="" LocaleVariant=""><DataId PieColor="#0000FF" PieCaption="">12.0</DataId><DataId PieColor="#FF0000" PieCaption="">12.1</DataId></DataIds></PieChartLabel><InvisibleData Id="12.1" Text="0.999994" IsDecimal="true"></InvisibleData><InvisibleData Id="12.0" Text="6.0E-6" IsDecimal="true"></InvisibleData></Branch><Node Text="Oxyporus procerus GornTaezhFE18" IsDecimal="false" UniqueName="5t38s94fw7" TextColor="#000000" TextHeight="6.0" TextStyle="" FontFamily="Arial" DecimalFormat="#0.0#####" LocaleLang="en" LocaleCountry="" LocaleVariant="" LineColor="#000000" LineWidth="0.3" EdgeRadius="1.0"><LeafMargin Left="1.0" Top="0.3" Right="1.0" Bottom="0.3"></LeafMargin><Branch Length="0.001027912" LineColor="#000000" LineWidth="0.3" ConstantWidth="false" MinLength="4.0" MinSpaceAbove="0.0" MinSpaceBelow="0.0"></Branch></Node><Node Text="Oxyporus procerus larvaGornTaezhFE18" IsDecimal="false" UniqueName="5u9alwrbxa" TextColor="#000000" TextHeight="6.0" TextStyle="" FontFamily="Arial" DecimalFormat="#0.0#####" LocaleLang="en" LocaleCountry="" LocaleVariant="" LineColor="#000000" LineWidth="0.3" EdgeRadius="1.0"><LeafMargin Left="1.0" Top="0.3" Right="1.0" Bottom="0.3"></LeafMargin><Branch Length="0.001036376" LineColor="#000000" LineWidth="0.3" ConstantWidth="false" MinLength="4.0" MinSpaceAbove="0.0" MinSpaceBelow="0.0"></Branch></Node></Node></Node></Node></Node><Node Text="internalNode44" IsDecimal="false" UniqueName="981lg6ti5b" TextColor="#000000" TextHeight="6.0" TextStyle="" FontFamily="Arial" DecimalFormat="#0.0#####" LocaleLang="en" LocaleCountry="" LocaleVariant="" LineColor="#000000" LineWidth="0.3" EdgeRadius="1.0"><LeafMargin Left="1.0" Top="0.3" Right="1.0" Bottom="0.3"></LeafMargin><Branch Length="0.03728185" LineColor="#000000" LineWidth="0.3" ConstantWidth="false" MinLength="4.0" MinSpaceAbove="0.0" MinSpaceBelow="0.0"><PieChartLabel TextColor="#000000" TextHeight="6.0" TextStyle="" FontFamily="Arial" DecimalFormat="#0.0#####" LocaleLang="en" LocaleCountry="" LocaleVariant="" LineColor="#000000" LineWidth="0.3" Width="6.0" Height="6.0" InternalLines="true" NullLines="false" ShowTitle="false" CaptionType="NONE" CaptionLinkType="STRAIGHT_LINES" Id="12" Above="true" LineNo="0" LinePos="0.0"><LabelMargin Left="1.0" Top="1.0" Right="1.0" Bottom="1.0"></LabelMargin><DataIds TextColor="#000000" TextStyle="" FontFamily="Arial" DecimalFormat="#0.0#####" LocaleLang="en" LocaleCountry="" LocaleVariant=""><DataId PieColor="#0000FF" PieCaption="">12.0</DataId><DataId PieColor="#FF0000" PieCaption="">12.1</DataId></DataIds></PieChartLabel><InvisibleData Id="12.1" Text="0.993868" IsDecimal="true"></InvisibleData><InvisibleData Id="12.0" Text="0.006132" IsDecimal="true"></InvisibleData></Branch><Node Text="internalNode45" IsDecimal="false" UniqueName="up6m8x01sv" TextColor="#000000" TextHeight="6.0" TextStyle="" FontFamily="Arial" DecimalFormat="#0.0#####" LocaleLang="en" LocaleCountry="" LocaleVariant="" LineColor="#000000" LineWidth="0.3" EdgeRadius="1.0"><LeafMargin Left="1.0" Top="0.3" Right="1.0" Bottom="0.3"></LeafMargin><Branch Length="0.02315972" LineColor="#000000" LineWidth="0.3" ConstantWidth="false" MinLength="4.0" MinSpaceAbove="0.0" MinSpaceBelow="0.0"><PieChartLabel TextColor="#000000" TextHeight="6.0" TextStyle="" FontFamily="Arial" DecimalFormat="#0.0#####" LocaleLang="en" LocaleCountry="" LocaleVariant="" LineColor="#000000" LineWidth="0.3" Width="6.0" Height="6.0" InternalLines="true" NullLines="false" ShowTitle="false" CaptionType="NONE" CaptionLinkType="STRAIGHT_LINES" Id="12" Above="true" LineNo="0" LinePos="0.0"><LabelMargin Left="1.0" Top="1.0" Right="1.0" Bottom="1.0"></LabelMargin><DataIds TextColor="#000000" TextStyle="" FontFamily="Arial" DecimalFormat="#0.0#####" LocaleLang="en" LocaleCountry="" LocaleVariant=""><DataId PieColor="#0000FF" PieCaption="">12.0</DataId><DataId PieColor="#FF0000" PieCaption="">12.1</DataId></DataIds></PieChartLabel><InvisibleData Id="12.1" Text="0.999721" IsDecimal="true"></InvisibleData><InvisibleData Id="12.0" Text="2.79E-4" IsDecimal="true"></InvisibleData></Branch><Node Text="internalNode46" IsDecimal="false" UniqueName="15zudlnv5a" TextColor="#000000" TextHeight="6.0" TextStyle="" FontFamily="Arial" DecimalFormat="#0.0#####" LocaleLang="en" LocaleCountry="" LocaleVariant="" LineColor="#000000" LineWidth="0.3" EdgeRadius="1.0"><LeafMargin Left="1.0" Top="0.3" Right="1.0" Bottom="0.3"></LeafMargin><Branch Length="0.006573462" LineColor="#000000" LineWidth="0.3" ConstantWidth="false" MinLength="4.0" MinSpaceAbove="0.0" MinSpaceBelow="0.0"><PieChartLabel TextColor="#000000" TextHeight="6.0" TextStyle="" FontFamily="Arial" DecimalFormat="#0.0#####" LocaleLang="en" LocaleCountry="" LocaleVariant="" LineColor="#000000" LineWidth="0.3" Width="6.0" Height="6.0" InternalLines="true" NullLines="false" ShowTitle="false" CaptionType="NONE" CaptionLinkType="STRAIGHT_LINES" Id="12" Above="true" LineNo="0" LinePos="0.0"><LabelMargin Left="1.0" Top="1.0" Right="1.0" Bottom="1.0"></LabelMargin><DataIds TextColor="#000000" TextStyle="" FontFamily="Arial" DecimalFormat="#0.0#####" LocaleLang="en" LocaleCountry="" LocaleVariant=""><DataId PieColor="#0000FF" PieCaption="">12.0</DataId><DataId PieColor="#FF0000" PieCaption="">12.1</DataId></DataIds></PieChartLabel><InvisibleData Id="12.1" Text="0.999916" IsDecimal="true"></InvisibleData><InvisibleData Id="12.0" Text="8.4E-5" IsDecimal="true"></InvisibleData></Branch><Node Text="internalNode47" IsDecimal="false" UniqueName="f14stn005o" TextColor="#000000" TextHeight="6.0" TextStyle="" FontFamily="Arial" DecimalFormat="#0.0#####" LocaleLang="en" LocaleCountry="" LocaleVariant="" LineColor="#000000" LineWidth="0.3" EdgeRadius="1.0"><LeafMargin Left="1.0" Top="0.3" Right="1.0" Bottom="0.3"></LeafMargin><Branch Length="0.002827889" LineColor="#000000" LineWidth="0.3" ConstantWidth="false" MinLength="4.0" MinSpaceAbove="0.0" MinSpaceBelow="0.0"><PieChartLabel TextColor="#000000" TextHeight="6.0" TextStyle="" FontFamily="Arial" DecimalFormat="#0.0#####" LocaleLang="en" LocaleCountry="" LocaleVariant="" LineColor="#000000" LineWidth="0.3" Width="6.0" Height="6.0" InternalLines="true" NullLines="false" ShowTitle="false" CaptionType="NONE" CaptionLinkType="STRAIGHT_LINES" Id="12" Above="true" LineNo="0" LinePos="0.0"><LabelMargin Left="1.0" Top="1.0" Right="1.0" Bottom="1.0"></LabelMargin><DataIds TextColor="#000000" TextStyle="" FontFamily="Arial" DecimalFormat="#0.0#####" LocaleLang="en" LocaleCountry="" LocaleVariant=""><DataId PieColor="#0000FF" PieCaption="">12.0</DataId><DataId PieColor="#FF0000" PieCaption="">12.1</DataId></DataIds></PieChartLabel><InvisibleData Id="12.1" Text="0.999973" IsDecimal="true"></InvisibleData><InvisibleData Id="12.0" Text="2.7E-5" IsDecimal="true"></InvisibleData></Branch><Node Text="internalNode48" IsDecimal="false" UniqueName="652016s9e7" TextColor="#000000" TextHeight="6.0" TextStyle="" FontFamily="Arial" DecimalFormat="#0.0#####" LocaleLang="en" LocaleCountry="" LocaleVariant="" LineColor="#000000" LineWidth="0.3" EdgeRadius="1.0"><LeafMargin Left="1.0" Top="0.3" Right="1.0" Bottom="0.3"></LeafMargin><Branch Length="0.002716934" LineColor="#000000" LineWidth="0.3" ConstantWidth="false" MinLength="4.0" MinSpaceAbove="0.0" MinSpaceBelow="0.0"><PieChartLabel TextColor="#000000" TextHeight="6.0" TextStyle="" FontFamily="Arial" DecimalFormat="#0.0#####" LocaleLang="en" LocaleCountry="" LocaleVariant="" LineColor="#000000" LineWidth="0.3" Width="6.0" Height="6.0" InternalLines="true" NullLines="false" ShowTitle="false" CaptionType="NONE" CaptionLinkType="STRAIGHT_LINES" Id="12" Above="true" LineNo="0" LinePos="0.0"><LabelMargin Left="1.0" Top="1.0" Right="1.0" Bottom="1.0"></LabelMargin><DataIds TextColor="#000000" TextStyle="" FontFamily="Arial" DecimalFormat="#0.0#####" LocaleLang="en" LocaleCountry="" LocaleVariant=""><DataId PieColor="#0000FF" PieCaption="">12.0</DataId><DataId PieColor="#FF0000" PieCaption="">12.1</DataId></DataIds></PieChartLabel><InvisibleData Id="12.1" Text="0.999986" IsDecimal="true"></InvisibleData><InvisibleData Id="12.0" Text="1.4E-5" IsDecimal="true"></InvisibleData></Branch><Node Text="Oxyporus aequicollis PogranFE19 41" IsDecimal="false" UniqueName="jch09ejibb" TextColor="#000000" TextHeight="6.0" TextStyle="" FontFamily="Arial" DecimalFormat="#0.0#####" LocaleLang="en" LocaleCountry="" LocaleVariant="" LineColor="#000000" LineWidth="0.3" EdgeRadius="1.0"><LeafMargin Left="1.0" Top="0.3" Right="1.0" Bottom="0.3"></LeafMargin><Branch Length="0.001051766" LineColor="#000000" LineWidth="0.3" ConstantWidth="false" MinLength="4.0" MinSpaceAbove="0.0" MinSpaceBelow="0.0"></Branch></Node><Node Text="Oxyporus basicornis AnisimFE19 51" IsDecimal="false" UniqueName="g9gzhv2rp4" TextColor="#000000" TextHeight="6.0" TextStyle="" FontFamily="Arial" DecimalFormat="#0.0#####" LocaleLang="en" LocaleCountry="" LocaleVariant="" LineColor="#000000" LineWidth="0.3" EdgeRadius="1.0"><LeafMargin Left="1.0" Top="0.3" Right="1.0" Bottom="0.3"></LeafMargin><Branch Length="0.002506712" LineColor="#000000" LineWidth="0.3" ConstantWidth="false" MinLength="4.0" MinSpaceAbove="0.0" MinSpaceBelow="0.0"></Branch></Node></Node><Node Text="Oxyporus germanus dark AnisimFE19 18" IsDecimal="false" UniqueName="a0tfqitpqv" TextColor="#000000" TextHeight="6.0" TextStyle="" FontFamily="Arial" DecimalFormat="#0.0#####" LocaleLang="en" LocaleCountry="" LocaleVariant="" LineColor="#000000" LineWidth="0.3" EdgeRadius="1.0"><LeafMargin Left="1.0" Top="0.3" Right="1.0" Bottom="0.3"></LeafMargin><Branch Length="0.001902456" LineColor="#000000" LineWidth="0.3" ConstantWidth="false" MinLength="4.0" MinSpaceAbove="0.0" MinSpaceBelow="0.0"></Branch></Node></Node><Node Text="internalNode49" IsDecimal="false" UniqueName="5zjhudjirr" TextColor="#000000" TextHeight="6.0" TextStyle="" FontFamily="Arial" DecimalFormat="#0.0#####" LocaleLang="en" LocaleCountry="" LocaleVariant="" LineColor="#000000" LineWidth="0.3" EdgeRadius="1.0"><LeafMargin Left="1.0" Top="0.3" Right="1.0" Bottom="0.3"></LeafMargin><Branch Length="0.005759409" LineColor="#000000" LineWidth="0.3" ConstantWidth="false" MinLength="4.0" MinSpaceAbove="0.0" MinSpaceBelow="0.0"><PieChartLabel TextColor="#000000" TextHeight="6.0" TextStyle="" FontFamily="Arial" DecimalFormat="#0.0#####" LocaleLang="en" LocaleCountry="" LocaleVariant="" LineColor="#000000" LineWidth="0.3" Width="6.0" Height="6.0" InternalLines="true" NullLines="false" ShowTitle="false" CaptionType="NONE" CaptionLinkType="STRAIGHT_LINES" Id="12" Above="true" LineNo="0" LinePos="0.0"><LabelMargin Left="1.0" Top="1.0" Right="1.0" Bottom="1.0"></LabelMargin><DataIds TextColor="#000000" TextStyle="" FontFamily="Arial" DecimalFormat="#0.0#####" LocaleLang="en" LocaleCountry="" LocaleVariant=""><DataId PieColor="#0000FF" PieCaption="">12.0</DataId><DataId PieColor="#FF0000" PieCaption="">12.1</DataId></DataIds></PieChartLabel><InvisibleData Id="12.1" Text="1.0" IsDecimal="true"></InvisibleData><InvisibleData Id="12.0" Text="0.0" IsDecimal="true"></InvisibleData></Branch><Node Text="Oxyporus germanus2 CNUIC597" IsDecimal="false" UniqueName="8djgd2g7i1" TextColor="#000000" TextHeight="6.0" TextStyle="" FontFamily="Arial" DecimalFormat="#0.0#####" LocaleLang="en" LocaleCountry="" LocaleVariant="" LineColor="#000000" LineWidth="0.3" EdgeRadius="1.0"><LeafMargin Left="1.0" Top="0.3" Right="1.0" Bottom="0.3"></LeafMargin><Branch Length="0.003045975" LineColor="#000000" LineWidth="0.3" ConstantWidth="false" MinLength="4.0" MinSpaceAbove="0.0" MinSpaceBelow="0.0"></Branch></Node><Node Text="Oxyporus germanus3 CNUIC599" IsDecimal="false" UniqueName="1slyehtp4l" TextColor="#000000" TextHeight="6.0" TextStyle="" FontFamily="Arial" DecimalFormat="#0.0#####" LocaleLang="en" LocaleCountry="" LocaleVariant="" LineColor="#000000" LineWidth="0.3" EdgeRadius="1.0"><LeafMargin Left="1.0" Top="0.3" Right="1.0" Bottom="0.3"></LeafMargin><Branch Length="0.002450024" LineColor="#000000" LineWidth="0.3" ConstantWidth="false" MinLength="4.0" MinSpaceAbove="0.0" MinSpaceBelow="0.0"></Branch></Node><Node Text="internalNode50" IsDecimal="false" UniqueName="x2e7iioxia" TextColor="#000000" TextHeight="6.0" TextStyle="" FontFamily="Arial" DecimalFormat="#0.0#####" LocaleLang="en" LocaleCountry="" LocaleVariant="" LineColor="#000000" LineWidth="0.3" EdgeRadius="1.0"><LeafMargin Left="1.0" Top="0.3" Right="1.0" Bottom="0.3"></LeafMargin><Branch Length="0.003057528" LineColor="#000000" LineWidth="0.3" ConstantWidth="false" MinLength="4.0" MinSpaceAbove="0.0" MinSpaceBelow="0.0"><PieChartLabel TextColor="#000000" TextHeight="6.0" TextStyle="" FontFamily="Arial" DecimalFormat="#0.0#####" LocaleLang="en" LocaleCountry="" LocaleVariant="" LineColor="#000000" LineWidth="0.3" Width="6.0" Height="6.0" InternalLines="true" NullLines="false" ShowTitle="false" CaptionType="NONE" CaptionLinkType="STRAIGHT_LINES" Id="12" Above="true" LineNo="0" LinePos="0.0"><LabelMargin Left="1.0" Top="1.0" Right="1.0" Bottom="1.0"></LabelMargin><DataIds TextColor="#000000" TextStyle="" FontFamily="Arial" DecimalFormat="#0.0#####" LocaleLang="en" LocaleCountry="" LocaleVariant=""><DataId PieColor="#0000FF" PieCaption="">12.0</DataId><DataId PieColor="#FF0000" PieCaption="">12.1</DataId></DataIds></PieChartLabel><InvisibleData Id="12.1" Text="0.999978" IsDecimal="true"></InvisibleData><InvisibleData Id="12.0" Text="2.2E-5" IsDecimal="true"></InvisibleData></Branch><Node Text="Oxyporus germanus4 CNUIC600" IsDecimal="false" UniqueName="f49uwp63np" TextColor="#000000" TextHeight="6.0" TextStyle="" FontFamily="Arial" DecimalFormat="#0.0#####" LocaleLang="en" LocaleCountry="" LocaleVariant="" LineColor="#000000" LineWidth="0.3" EdgeRadius="1.0"><LeafMargin Left="1.0" Top="0.3" Right="1.0" Bottom="0.3"></LeafMargin><Branch Length="0.004016098" LineColor="#000000" LineWidth="0.3" ConstantWidth="false" MinLength="4.0" MinSpaceAbove="0.0" MinSpaceBelow="0.0"></Branch></Node><Node Text="Oxyporus germanus5 CNUIC640" IsDecimal="false" UniqueName="s9ynh9evbk" TextColor="#000000" TextHeight="6.0" TextStyle="" FontFamily="Arial" DecimalFormat="#0.0#####" LocaleLang="en" LocaleCountry="" LocaleVariant="" LineColor="#000000" LineWidth="0.3" EdgeRadius="1.0"><LeafMargin Left="1.0" Top="0.3" Right="1.0" Bottom="0.3"></LeafMargin><Branch Length="0.001066973" LineColor="#000000" LineWidth="0.3" ConstantWidth="false" MinLength="4.0" MinSpaceAbove="0.0" MinSpaceBelow="0.0"></Branch></Node></Node></Node></Node><Node Text="Oxyporus germanus1 CNUIC515" IsDecimal="false" UniqueName="prp6kld2r8" TextColor="#000000" TextHeight="6.0" TextStyle="" FontFamily="Arial" DecimalFormat="#0.0#####" LocaleLang="en" LocaleCountry="" LocaleVariant="" LineColor="#000000" LineWidth="0.3" EdgeRadius="1.0"><LeafMargin Left="1.0" Top="0.3" Right="1.0" Bottom="0.3"></LeafMargin><Branch Length="0.008300195" LineColor="#000000" LineWidth="0.3" ConstantWidth="false" MinLength="4.0" MinSpaceAbove="0.0" MinSpaceBelow="0.0"></Branch></Node></Node><Node Text="internalNode51" IsDecimal="false" UniqueName="o29lfp77is" TextColor="#000000" TextHeight="6.0" TextStyle="" FontFamily="Arial" DecimalFormat="#0.0#####" LocaleLang="en" LocaleCountry="" LocaleVariant="" LineColor="#000000" LineWidth="0.3" EdgeRadius="1.0"><LeafMargin Left="1.0" Top="0.3" Right="1.0" Bottom="0.3"></LeafMargin><Branch Length="0.05594781" LineColor="#000000" LineWidth="0.3" ConstantWidth="false" MinLength="4.0" MinSpaceAbove="0.0" MinSpaceBelow="0.0"><PieChartLabel TextColor="#000000" TextHeight="6.0" TextStyle="" FontFamily="Arial" DecimalFormat="#0.0#####" LocaleLang="en" LocaleCountry="" LocaleVariant="" LineColor="#000000" LineWidth="0.3" Width="6.0" Height="6.0" InternalLines="true" NullLines="false" ShowTitle="false" CaptionType="NONE" CaptionLinkType="STRAIGHT_LINES" Id="12" Above="true" LineNo="0" LinePos="0.0"><LabelMargin Left="1.0" Top="1.0" Right="1.0" Bottom="1.0"></LabelMargin><DataIds TextColor="#000000" TextStyle="" FontFamily="Arial" DecimalFormat="#0.0#####" LocaleLang="en" LocaleCountry="" LocaleVariant=""><DataId PieColor="#0000FF" PieCaption="">12.0</DataId><DataId PieColor="#FF0000" PieCaption="">12.1</DataId></DataIds></PieChartLabel><InvisibleData Id="12.1" Text="1.0" IsDecimal="true"></InvisibleData><InvisibleData Id="12.0" Text="0.0" IsDecimal="true"></InvisibleData></Branch><Node Text="internalNode52" IsDecimal="false" UniqueName="9tc7cpdpw8" TextColor="#000000" TextHeight="6.0" TextStyle="" FontFamily="Arial" DecimalFormat="#0.0#####" LocaleLang="en" LocaleCountry="" LocaleVariant="" LineColor="#000000" LineWidth="0.3" EdgeRadius="1.0"><LeafMargin Left="1.0" Top="0.3" Right="1.0" Bottom="0.3"></LeafMargin><Branch Length="0.005363108" LineColor="#000000" LineWidth="0.3" ConstantWidth="false" MinLength="4.0" MinSpaceAbove="0.0" MinSpaceBelow="0.0"><PieChartLabel TextColor="#000000" TextHeight="6.0" TextStyle="" FontFamily="Arial" DecimalFormat="#0.0#####" LocaleLang="en" LocaleCountry="" LocaleVariant="" LineColor="#000000" LineWidth="0.3" Width="6.0" Height="6.0" InternalLines="true" NullLines="false" ShowTitle="false" CaptionType="NONE" CaptionLinkType="STRAIGHT_LINES" Id="12" Above="true" LineNo="0" LinePos="0.0"><LabelMargin Left="1.0" Top="1.0" Right="1.0" Bottom="1.0"></LabelMargin><DataIds TextColor="#000000" TextStyle="" FontFamily="Arial" DecimalFormat="#0.0#####" LocaleLang="en" LocaleCountry="" LocaleVariant=""><DataId PieColor="#0000FF" PieCaption="">12.0</DataId><DataId PieColor="#FF0000" PieCaption="">12.1</DataId></DataIds></PieChartLabel><InvisibleData Id="12.1" Text="1.0" IsDecimal="true"></InvisibleData><InvisibleData Id="12.0" Text="0.0" IsDecimal="true"></InvisibleData></Branch><Node Text="Oxyporus rufus Bor19 35" IsDecimal="false" UniqueName="wutbn51f65" TextColor="#000000" TextHeight="6.0" TextStyle="" FontFamily="Arial" DecimalFormat="#0.0#####" LocaleLang="en" LocaleCountry="" LocaleVariant="" LineColor="#000000" LineWidth="0.3" EdgeRadius="1.0"><LeafMargin Left="1.0" Top="0.3" Right="1.0" Bottom="0.3"></LeafMargin><Branch Length="0.002493184" LineColor="#000000" LineWidth="0.3" ConstantWidth="false" MinLength="4.0" MinSpaceAbove="0.0" MinSpaceBelow="0.0"></Branch></Node><Node Text="Oxyporus rufus GornTaezhFE18 09" IsDecimal="false" UniqueName="e7ls2000w2" TextColor="#000000" TextHeight="6.0" TextStyle="" FontFamily="Arial" DecimalFormat="#0.0#####" LocaleLang="en" LocaleCountry="" LocaleVariant="" LineColor="#000000" LineWidth="0.3" EdgeRadius="1.0"><LeafMargin Left="1.0" Top="0.3" Right="1.0" Bottom="0.3"></LeafMargin><Branch Length="0.00102175" LineColor="#000000" LineWidth="0.3" ConstantWidth="false" MinLength="4.0" MinSpaceAbove="0.0" MinSpaceBelow="0.0"></Branch></Node><Node Text="Oxyporus rufus NCBI Finl KJ965221 1" IsDecimal="false" UniqueName="42ef05ee16" TextColor="#000000" TextHeight="6.0" TextStyle="" FontFamily="Arial" DecimalFormat="#0.0#####" LocaleLang="en" LocaleCountry="" LocaleVariant="" LineColor="#000000" LineWidth="0.3" EdgeRadius="1.0"><LeafMargin Left="1.0" Top="0.3" Right="1.0" Bottom="0.3"></LeafMargin><Branch Length="0.001103536" LineColor="#000000" LineWidth="0.3" ConstantWidth="false" MinLength="4.0" MinSpaceAbove="0.0" MinSpaceBelow="0.0"></Branch></Node><Node Text="Oxyporus rufus ZMUO NCBI Finl KJ966577 1" IsDecimal="false" UniqueName="5dpc6vjecg" TextColor="#000000" TextHeight="6.0" TextStyle="" FontFamily="Arial" DecimalFormat="#0.0#####" LocaleLang="en" LocaleCountry="" LocaleVariant="" LineColor="#000000" LineWidth="0.3" EdgeRadius="1.0"><LeafMargin Left="1.0" Top="0.3" Right="1.0" Bottom="0.3"></LeafMargin><Branch Length="0.001109042" LineColor="#000000" LineWidth="0.3" ConstantWidth="false" MinLength="4.0" MinSpaceAbove="0.0" MinSpaceBelow="0.0"></Branch></Node><Node Text="Oxyporus rufus1 KJ964395" IsDecimal="false" UniqueName="5d2z4qaj5t" TextColor="#000000" TextHeight="6.0" TextStyle="" FontFamily="Arial" DecimalFormat="#0.0#####" LocaleLang="en" LocaleCountry="" LocaleVariant="" LineColor="#000000" LineWidth="0.3" EdgeRadius="1.0"><LeafMargin Left="1.0" Top="0.3" Right="1.0" Bottom="0.3"></LeafMargin><Branch Length="0.002433899" LineColor="#000000" LineWidth="0.3" ConstantWidth="false" MinLength="4.0" MinSpaceAbove="0.0" MinSpaceBelow="0.0"></Branch></Node><Node Text="Oxyporus rufus2 KJ965221" IsDecimal="false" UniqueName="a1cbun0xm6" TextColor="#000000" TextHeight="6.0" TextStyle="" FontFamily="Arial" DecimalFormat="#0.0#####" LocaleLang="en" LocaleCountry="" LocaleVariant="" LineColor="#000000" LineWidth="0.3" EdgeRadius="1.0"><LeafMargin Left="1.0" Top="0.3" Right="1.0" Bottom="0.3"></LeafMargin><Branch Length="0.001034642" LineColor="#000000" LineWidth="0.3" ConstantWidth="false" MinLength="4.0" MinSpaceAbove="0.0" MinSpaceBelow="0.0"></Branch></Node><Node Text="Oxyporus rufus3 KJ966577" IsDecimal="false" UniqueName="qskpiquemu" TextColor="#000000" TextHeight="6.0" TextStyle="" FontFamily="Arial" DecimalFormat="#0.0#####" LocaleLang="en" LocaleCountry="" LocaleVariant="" LineColor="#000000" LineWidth="0.3" EdgeRadius="1.0"><LeafMargin Left="1.0" Top="0.3" Right="1.0" Bottom="0.3"></LeafMargin><Branch Length="0.001034602" LineColor="#000000" LineWidth="0.3" ConstantWidth="false" MinLength="4.0" MinSpaceAbove="0.0" MinSpaceBelow="0.0"></Branch></Node></Node><Node Text="Oxyporus rufus NCBI Germ KU906276 1" IsDecimal="false" UniqueName="a3ci97xddx" TextColor="#000000" TextHeight="6.0" TextStyle="" FontFamily="Arial" DecimalFormat="#0.0#####" LocaleLang="en" LocaleCountry="" LocaleVariant="" LineColor="#000000" LineWidth="0.3" EdgeRadius="1.0"><LeafMargin Left="1.0" Top="0.3" Right="1.0" Bottom="0.3"></LeafMargin><Branch Length="0.001116525" LineColor="#000000" LineWidth="0.3" ConstantWidth="false" MinLength="4.0" MinSpaceAbove="0.0" MinSpaceBelow="0.0"></Branch></Node><Node Text="Oxyporus rufus NCBI Germ KU915441 1" IsDecimal="false" UniqueName="0kk60amhax" TextColor="#000000" TextHeight="6.0" TextStyle="" FontFamily="Arial" DecimalFormat="#0.0#####" LocaleLang="en" LocaleCountry="" LocaleVariant="" LineColor="#000000" LineWidth="0.3" EdgeRadius="1.0"><LeafMargin Left="1.0" Top="0.3" Right="1.0" Bottom="0.3"></LeafMargin><Branch Length="0.001143182" LineColor="#000000" LineWidth="0.3" ConstantWidth="false" MinLength="4.0" MinSpaceAbove="0.0" MinSpaceBelow="0.0"></Branch></Node><Node Text="Oxyporus rufus Petergof18 34" IsDecimal="false" UniqueName="i2alur2du5" TextColor="#000000" TextHeight="6.0" TextStyle="" FontFamily="Arial" DecimalFormat="#0.0#####" LocaleLang="en" LocaleCountry="" LocaleVariant="" LineColor="#000000" LineWidth="0.3" EdgeRadius="1.0"><LeafMargin Left="1.0" Top="0.3" Right="1.0" Bottom="0.3"></LeafMargin><Branch Length="0.003370751" LineColor="#000000" LineWidth="0.3" ConstantWidth="false" MinLength="4.0" MinSpaceAbove="0.0" MinSpaceBelow="0.0"></Branch></Node></Node></Node></Node><Node Text="internalNode53" IsDecimal="false" UniqueName="78hq86o2eh" TextColor="#000000" TextHeight="6.0" TextStyle="" FontFamily="Arial" DecimalFormat="#0.0#####" LocaleLang="en" LocaleCountry="" LocaleVariant="" LineColor="#000000" LineWidth="0.3" EdgeRadius="1.0"><LeafMargin Left="1.0" Top="0.3" Right="1.0" Bottom="0.3"></LeafMargin><Branch Length="0.07839028" LineColor="#000000" LineWidth="0.3" ConstantWidth="false" MinLength="4.0" MinSpaceAbove="0.0" MinSpaceBelow="0.0"><PieChartLabel TextColor="#000000" TextHeight="6.0" TextStyle="" FontFamily="Arial" DecimalFormat="#0.0#####" LocaleLang="en" LocaleCountry="" LocaleVariant="" LineColor="#000000" LineWidth="0.3" Width="6.0" Height="6.0" InternalLines="true" NullLines="false" ShowTitle="false" CaptionType="NONE" CaptionLinkType="STRAIGHT_LINES" Id="12" Above="true" LineNo="0" LinePos="0.0"><LabelMargin Left="1.0" Top="1.0" Right="1.0" Bottom="1.0"></LabelMargin><DataIds TextColor="#000000" TextStyle="" FontFamily="Arial" DecimalFormat="#0.0#####" LocaleLang="en" LocaleCountry="" LocaleVariant=""><DataId PieColor="#0000FF" PieCaption="">12.0</DataId><DataId PieColor="#FF0000" PieCaption="">12.1</DataId></DataIds></PieChartLabel><InvisibleData Id="12.1" Text="1.0" IsDecimal="true"></InvisibleData><InvisibleData Id="12.0" Text="0.0" IsDecimal="true"></InvisibleData></Branch><Node Text="Oxyporus mannerheimii AnisimFE19 06" IsDecimal="false" UniqueName="lhhmc5lz00" TextColor="#000000" TextHeight="6.0" TextStyle="" FontFamily="Arial" DecimalFormat="#0.0#####" LocaleLang="en" LocaleCountry="" LocaleVariant="" LineColor="#000000" LineWidth="0.3" EdgeRadius="1.0"><LeafMargin Left="1.0" Top="0.3" Right="1.0" Bottom="0.3"></LeafMargin><Branch Length="0.001022218" LineColor="#000000" LineWidth="0.3" ConstantWidth="false" MinLength="4.0" MinSpaceAbove="0.0" MinSpaceBelow="0.0"></Branch></Node><Node Text="Oxyporus mannerheimii Sverdl19 16" IsDecimal="false" UniqueName="me0oq6c2mk" TextColor="#000000" TextHeight="6.0" TextStyle="" FontFamily="Arial" DecimalFormat="#0.0#####" LocaleLang="en" LocaleCountry="" LocaleVariant="" LineColor="#000000" LineWidth="0.3" EdgeRadius="1.0"><LeafMargin Left="1.0" Top="0.3" Right="1.0" Bottom="0.3"></LeafMargin><Branch Length="0.00103873" LineColor="#000000" LineWidth="0.3" ConstantWidth="false" MinLength="4.0" MinSpaceAbove="0.0" MinSpaceBelow="0.0"></Branch></Node><Node Text="Oxyporus mannerheimii TolmachLO18 26" IsDecimal="false" UniqueName="9z0t0jdph6" TextColor="#000000" TextHeight="6.0" TextStyle="" FontFamily="Arial" DecimalFormat="#0.0#####" LocaleLang="en" LocaleCountry="" LocaleVariant="" LineColor="#000000" LineWidth="0.3" EdgeRadius="1.0"><LeafMargin Left="1.0" Top="0.3" Right="1.0" Bottom="0.3"></LeafMargin><Branch Length="0.001024498" LineColor="#000000" LineWidth="0.3" ConstantWidth="false" MinLength="4.0" MinSpaceAbove="0.0" MinSpaceBelow="0.0"></Branch></Node></Node></Node></Node><Node Text="Philonthus tenuicornis KU918645 1" IsDecimal="false" UniqueName="si3o23af6s" TextColor="#000000" TextHeight="6.0" TextStyle="" FontFamily="Arial" DecimalFormat="#0.0#####" LocaleLang="en" LocaleCountry="" LocaleVariant="" LineColor="#000000" LineWidth="0.3" EdgeRadius="1.0"><LeafMargin Left="1.0" Top="0.3" Right="1.0" Bottom="0.3"></LeafMargin><Branch Length="0.1401961" LineColor="#000000" LineWidth="0.3" ConstantWidth="false" MinLength="4.0" MinSpaceAbove="0.0" MinSpaceBelow="0.0"></Branch></Node></Node></Node><ScaleBar LineColor="#000000" LineWidth="0.3" TextColor="#000000" TextHeight="4.0" TextStyle="" FontFamily="Arial" DecimalFormat="#0.0#####" LocaleLang="en" LocaleCountry="" LocaleVariant="" Align="left" TreeDistance="2.0" Width="20.0mm" Height="3.0" SmallInterval="0.003" LongInterval="10" StartLeft="true" Increasing="true"></ScaleBar></Tree></TreegraphDocument>
